# Supplementary material for: Structural evolution of an immune evasion determinant shapes pathogen host tropism
Source: PubMed Central journal article supplement — Proc Natl Acad Sci U S A. 2023 Jun 26;120(27):e2301549120. doi: 10.1073/pnas.2301549120 (PMC10319004; doi:10.1073/pnas.2301549120), 2023-06-26
Supplement: pnas.2301549120.sapp.pdf [file pnas.2301549120.sapp.pdf]

1 **SUPPLEMENTARY INFORMATION**

2 **SUPPLEMENTARY METHODS**

3 **Ethics statement.** All mouse and quail experiments were performed in strict accordance with all  
4 provisions of the Animal Welfare Act, the Guide for the Care and Use of Laboratory Animals, and  
5 the PHS Policy on Humane Care and Use of Laboratory Animals. The protocol was approved by  
6 the Institutional Animal Care and Use Committee (IACUC) of Wadsworth Center, New York State  
7 Department of Health (Protocol docket number 19-451). All efforts were made to minimize animal  
8 suffering.

9  
10 **Mice, quail, ticks, bacterial strains, human blood, animal sera, OmCI, and FH.** BALB/c and  
11 Swiss Webster mice were purchased from Taconic (Hudson, NY). C3<sup>-/-</sup> mice in the BALB/c  
12 background were generated from the C3<sup>-/-</sup>(C57BL/6) from Jackson Laboratory (Bar Harbor, ME)  
13 as described (1). *Coturnix* quail were purchased from Cavendish Game Birds Farm (Springfield,  
14 VT). *Ixodes scapularis* tick larvae were purchased from National Tick Research and Education  
15 Center, Oklahoma State University (Stillwater, OK) or obtained from the CDC through BEI  
16 Resources (Manassas, VA).

17         The *Escherichia coli*, *Pichia pastoris* and *Borrelia* strains used in this study are described  
18 in **Table S7**. *E. coli* strains DH5 $\alpha$ , BL21(DE3), and derivatives were grown in LB broth or agar,  
19 supplemented with kanamycin (50 $\mu$ g/ml), ampicillin (100 $\mu$ g/ml), or no antibiotics as appropriate.  
20 *P. pastoris* strain X-33 was grown on YPD plates supplemented with zeocin (800 $\mu$ g/ml) or BMGY  
21 medium supplemented with 1% methanol. All *B. burgdorferi* strains were grown in BSK-II

22 completed medium supplemented with kanamycin (200 $\mu$ g/mL), streptomycin (50 $\mu$ g/mL), or no  
23 antibiotics (**Table S7**).

24 Mouse FH was purchased from MyBiosource (San Diego, CA). Quail FH and recombinant  
25 OmCI proteins were generated as described previously (1-4). The deidentified Human blood was  
26 obtained from BioIVT (BioIVT, Westbury, NY). The mouse and quail sera were obtained from  
27 Southern Biotech, Inc (Birmingham, AL) and Canola Live Poultry Market (Brooklyn, NY),  
28 respectively. The sera from white-footed mice were obtained previously (5). Prior to being used,  
29 all these sera were screened for antibodies against the C6 peptide of the *B. burgdorferi* protein  
30 VlsE (6) with the C6 Lyme ELISA kit (Diamedix, Miami Lakes, FL) to ensure the mice did not  
31 have prior exposure to *B. burgdorferi*.

32  
33 **Generation of recombinant CspZ proteins and recombinant human FH SCR6-7.** To generate  
34 recombinant CspZ proteins for crystallization, *cspZ*<sub>B379</sub> (GenBank: FJ911671.1) and *cspZ*<sub>B408</sub>  
35 (GenBank: FJ911677.1) were amplified by PCR from the genomic DNA of *B. burgdorferi* strain  
36 B379 and B408 using the primers listed in **Table S8**. Note that B408 has two copies of *cspZ*, but  
37 they are functionally identical with only a single synonymous SNP at nucleotide 699 (4, 7). Based  
38 on the prediction by SignalP 4.1 (8) and according to our previous structural data from CspZ<sub>B31</sub>  
39 (9), the lipoprotein signal peptide (residues 1-22) was excluded from the amplified gene. The  
40 introduced *NcoI* and *NotI* restriction sites were used for ligation of the amplified fragments into  
41 the pETm-11 expression vector which contains the coding region for an N-terminal 6xHis tag and  
42 a tobacco etch virus (TEV) protease cleavage site. Expression in *E. coli*, purification by affinity  
43 chromatography, and 6xHis tag cleavage by TEV protease of both proteins CspZ<sub>B379</sub> and CspZ<sub>B408</sub>

44 were performed similarly as described previously for CspZ<sub>B31</sub> (9). The purified and cleaved  
45 proteins were buffer exchanged into 10 mM Tris-HCl (pH 8.0) and concentrated to 11mg/ml using  
46 an Amicon centrifugal filter unit (Millipore, Burlington, MA, USA).

47 To produce recombinant human FH for crystallization, the gene encoding the SCR6-7 of  
48 human FH was synthesized by BioCat GmbH (Heidelberg, Germany) and cloned into pPICZ $\alpha$ A  
49 vector behind the  $\alpha$ -factor secretion signal using *XhoI* and *NotI* restriction sites in a way to restore  
50 the Kex2 signal cleavage site. The plasmid was linearized with *PmeI* and transformed by  
51 electroporation into *Pichia pastoris* (reassigned as *Komagataella phaffii*) strain X-33.  
52 Transformants were obtained on YPD agar plates containing 800 $\mu$ g/ml of the antibiotic zeocin.  
53 The selected clone was cultivated 24-h in BMGY medium at 30°C with aeration (250rpm)  
54 following addition of 1% methanol daily, and cultivation was continued for three more days. The  
55 cell pellet was removed by low-speed centrifugation. Supernatant was buffer-exchanged into  
56 50mM sodium phosphate (pH 6.0) by Sephadex G-25 Fine column (bed volume 360ml) (Cytiva,  
57 Marlborough, MA, USA) in 100ml portions at a flow rate of 20ml/min. Two liters of supernatant  
58 was passed through the CptoS Improved Resolution column (bed volume 20ml) (Cytiva,  
59 Marlborough, MA, USA) and bound material was eluted with a linear salt gradient at a flow rate  
60 of 6ml/min. Target protein fractions were selected based on SDS-PAGE. The relevant fractions  
61 were pooled and buffer-exchanged into 20mM Tris-HCl (8.0), 50mM NaCl and 10mM NaH<sub>2</sub>PO<sub>4</sub>  
62 using an Amicon filter device (Millipore, Burlington, MA, USA).

63 To generate recombinant CspZ<sub>B379</sub> and CspZ<sub>B408</sub> for the studies other than crystallization,  
64 the region encoding *cspZ<sub>B379</sub>* or *cspZ<sub>B408</sub>* without the signal peptide was amplified as described  
65 above and engineered to encode *BamHI* and *Sall* sites at the 5' and 3' ends, respectively, allowing

66 subsequent cloning into the pJET cloning vector (Thermo Fisher Scientific, Waltham, MA). These  
67 pJET-derived plasmids encoding *cspZ<sub>B379</sub>* or *cspZ<sub>B408</sub>* were used as template for site-directed,  
68 ligase-independent mutagenesis (SLIM) (**Table S7, S8**) to generate plasmids producing CspZ<sub>B379</sub>-  
69 L<sub>B408</sub> and CspZ<sub>B408</sub>-L<sub>B379</sub> (10). After verifying the sequences of all the plasmids (Wadsworth  
70 ATGC facility), the DNA fragments were subsequently excised using *BamHI* and *Sall* and then  
71 inserted into the same sites in pGEX4T2 (GE Healthcare, Piscataway, NJ) (2). The pGEX4T2-  
72 derived plasmids were then transformed into the *E. coli* strain BL21(DE3). The GST-tagged CspZ  
73 proteins were produced and purified by affinity chromatography. These proteins were verified for  
74 their secondary structures not impacted by the mutagenesis using CD (**Fig. S16**), as described in  
75 the section “Circular dichroism (CD) spectroscopy.”

76 To generate recombinant CspZ from the last common ancestor states, pET-28a+ encoding  
77 these states flanked by *BamHI* and *Sall* sites at the 5' and 3' ends, respectively, were cloned  
78 (Synbio Technologies, Monmouth Junction, NJ). The plasmids were transformed into the *E. coli*  
79 strain BL21(DE3), and the His-tagged CspZ proteins were produced and purified by affinity  
80 chromatography.

81

82 **Crystallization and structure determination.** For crystallization of CspZ<sub>B379</sub> and CspZ<sub>B408</sub>, 96-  
83 well sitting drop plates were set using a Tecan Freedom EVO100 workstation (Tecan Group,  
84 Männedorf, Switzerland) by mixing 0.4µl of protein with 0.4µl of precipitant using the 96-reagent  
85 sparse-matrix screens JCSG+ and Structure Screen 1&2 (Molecular Dimensions, Newmarket, UK).  
86 The crystals for CspZ<sub>B379</sub> were obtained in 0.2M Ammonium citrate and 24% PEG 3350. For  
87 CspZ<sub>B408</sub>, the crystals were formed in 0.2M potassium acetate, 0.1M Tris-HCl (pH 8.0) and 28%

88 PEG 3350. Prior to the data collection, the crystals were frozen in liquid nitrogen. An additional  
89 20% glycerol was used as a cryoprotectant for CspZ<sub>B379</sub> crystals, whereas the respective precipitant  
90 with an additional 14% glycerol was used as cryoprotectant for CspZ<sub>B408</sub> crystals.

91 CspZ<sub>B408</sub> (4mg/ml) and human SCR6-7 (3mg/ml) were mixed together at a molar ratio of  
92 1:2 and loaded on a HiLoad 16/600 Superdex 200 prep grade column (GE Healthcare, Chicago,  
93 IL, USA) pre-equilibrated with 20mM Tris-HCl (8.0), 50mM NaCl and 10mM NaH<sub>2</sub>PO<sub>4</sub>. The  
94 flow rate was set to 2ml/min. Size exclusion chromatography resulted in one major peak containing  
95 the complex, confirmed by SDS-PAGE. Crystallization was set as described earlier for CspZ<sub>B379</sub>  
96 and CspZ<sub>B408</sub> by mixing 0.4μl of protein with 0.4μl of precipitant and using the 96-reagent sparse-  
97 matrix screens. The crystals for CspZ<sub>B408</sub>-SCR6-7 complex were obtained in 0.2M Zinc acetate,  
98 0.1M imidazole (pH 7.4) and 10% PEG 3000. Crystals were frozen in liquid nitrogen by using  
99 20% glycerol as a cryoprotectant.

100 Diffraction data for CspZ<sub>B379</sub>, CspZ<sub>B408</sub> and CspZ<sub>B408</sub>-SCR6-7 complex were collected at  
101 the MX beamline instrument BL 14.1 at Helmholtz-Zentrum, Berlin (11). Reflections were  
102 indexed by XDS and scaled by AIMLESS from the CCP4 suite (12-14). Initial phases for CspZ<sub>B379</sub>  
103 and CspZ<sub>B408</sub> were obtained by molecular replacement using Phaser (15), with the crystal structure  
104 of the orthologous protein CspZ<sub>B31</sub> was used as a searching model (97% sequence identity, PDB:  
105 4CBE). For CspZ<sub>B408</sub>-SCR6-7 complex, the phases were determined using CspZ<sub>B408</sub> (PDB: 7ZJK,  
106 RMSD: 0.98 Å) and human FH SCR6-7 (PDB: 4AYD-A, RMSD: 0.98 Å) as the searching models.  
107 After molecular replacement, the protein models were built automatically in BUCCANEER (16).  
108 The crystal structures were improved by manual rebuilding in COOT (17). Crystallographic  
109 refinement was performed using REFMAC5 (18). A summary of the data collection, refinement

110 and validation statistics for CspZ<sub>B379</sub>, CspZ<sub>B408</sub> and CspZ<sub>B408</sub>-SCR6-7 complex are given in **Table**  
111 **S9**.

112  
113 **Protein 3D structure prediction using AlphaFold.** AlphaFold v2.0 (19) was used to predict the  
114 3D structure for quail FH SCR6-7 extrapolated from the sequences of *Coturnix japonica* FH  
115 (GenBank: XM\_015869474.2). Structure prediction with AlphaFold v2.0 was performed at default  
116 parameters (<https://github.com/deepmind/alphafold/>) running on AMD Ryzen Threadripper  
117 2990WX 32-Core; 128 GB RAM; 4 x NVIDIA GeForce RTX 2080, and using the full databases  
118 downloaded on 2021-09-25. For further structural analysis, only the predicted structure with the  
119 highest confidence was used (as ranked by using LDDT (pLDDT) scores).

120  
121 **Circular dichroism (CD) spectroscopy.** CD analysis was performed on a Jasco 810  
122 spectropolarimeter (Jasco Analytical Instrument, Easton, MD) under nitrogen. CD spectra were  
123 measured at room temperature (RT, 25°C) in a 1mm path length quartz cell. Spectra of each of the  
124 CspZ proteins (10µM) were recorded in phosphate based saline buffer (PBS) at RT, and three far-  
125 UV CD spectra were recorded from 190-250nm in 1nm increments for far-UV CD. The  
126 background spectrum of PBS without proteins was subtracted from the protein spectra. CD spectra  
127 were initially analyzed by the software Spectra Manager Program (Jasco). Analysis of spectra to  
128 extrapolate secondary structures were performed using the K2D3 analysis programs (20).

129  
130 **ELISAs.** Quantitative ELISA was used to determine FH-binding by CspZ proteins, or ancestral  
131 proteins, as described previously (1, 21), with the following modifications: Mouse anti-GST tag

132 or mouse anti-His tag 1:200× (Sigma-Aldrich) and HRP-conjugated goat anti-mouse IgG 1:2,000×  
133 (Seracare Life Sciences) were used as primary and secondary antibodies, respectively, to detect  
134 the binding of GST- or histidine-tagged proteins.

135  
136 **Surface Plasmon Resonance (SPR).** Interactions of CspZ proteins with FH were analyzed by  
137 SPR using a Biacore T200 (Cytiva, Marlborough, MA). Ten micrograms of mouse or quail FH  
138 were conjugated to a CM5 chip (Cytiva) as described previously (21). For quantitative SPR  
139 experiments, 10µL of increasing concentrations (0.08, 0.03125, 0.0125, 0.5, 2µM) of each of the  
140 CspZ proteins were injected into the control cell and the flow cell immobilized with FH at 10µl/min,  
141 25°C. To obtain the kinetic parameters of the interaction, sensogram data were fitted by means of  
142 BIAevaluation software version 3.0 (GE Healthcare), using the one step biomolecular association  
143 reaction model (1:1 Langmuir model), resulting in optimum mathematical fit with the lowest Chi-  
144 square values.

145  
146 **Shuttle vector construction and plasmid transformation into *B. burgdorferi*.** “Loop swapped”  
147 CspZ variants (i.e., CspZ<sub>B379</sub>L<sub>B408</sub> and CspZ<sub>B408</sub>L<sub>B379</sub>) were designed based on the full-length  
148 sequences (B379 accession: OM643341; B408: accession: OM643340) and purchased as double-  
149 stranded DNA fragments flanked by *Bam*HI and *Sal*I on the 5’ and 3’, respectively (Integrated  
150 DNA Technologies, Inc., Coralville, IA). B31-A3Δ*cspZ* was complemented with these variants,  
151 or with native CspZ from B379 and B408 flanked by the same restriction enzyme sites (**Table S7**),  
152 in the same manner as the previously published strains of B31-A3Δ*cspZ*/pKFSS and B31-  
153 A3Δ*cspZ*/pCspZ<sub>B31</sub> (2).

154 The plasmid profiles of these spirochetes were examined to ascertain identical profiles  
155 between these strains and their parental strain B31-A3 (22). The generation time of these  
156 transformants was calculated as previously described (2). We also verified the strains were not  
157 affected by dosage effect, which can be caused by significant differences between the copy  
158 numbers of the native and complemented locations: herein, *Bb* plasmid lp28-3 and the shuttle  
159 vector pKFSS-1, respectively. We obtained the number of copies for a gene on shuttle vector  
160 pKFSS (*colE1*) or lp28-3 (*bbh17*) by performing qPCR using the primers listed in **Table S8** (23,  
161 24). The details on qPCR herein are outlined in the section, “Quantification of Spirochete Burden”.  
162 These samples included the DNA extracted from *in vitro* cultivated complemented  $\Delta$ *cspZ* strains,  
163 or the hearts from the mice and quail infected with each of these strains at 10dpf. The ratio of copy  
164 numbers between pKFSS vs. lp28-3 from each strain was close to one, suggesting any observed  
165 phenotypes of these strains are unlikely resulting from dosage effects (**Table S10**).

166

167 **Flow cytometry.** CspZ production and FH-binding on spirochete surface were determined as  
168 described (1), including blood-treatment to induce the production of CspZ (2). To determine the  
169 levels of mouse C5b-9 or quail C8 deposition on the surface of spirochetes, mouse or quail sera  
170 were incubated with  $1 \times 10^7$  spirochetes in PBS at a final concentration of 20% at 25°C for one hour.  
171 After incubation, spirochetes were washed then resuspended in HBSC-DB (25mM Hepes acid,  
172 150mM sodium chloride, 1mM MnCl<sub>2</sub>, 1mM MgCl<sub>2</sub>, 0.25mM CaCl<sub>2</sub>, 0.1% glucose, and 0.2%  
173 BSA). Rabbit anti-mouse C5b-9 polyclonal IgG (1:250x) (Complement Technology, Tyler, TX)  
174 or mouse anti-quail C8 polyclonal sera (1:250x) (4) were used as the primary antibodies. An Alexa  
175 647-conjugated goat anti-rabbit (ThermoFisher) or a goat anti-mouse IgG (ThermoFisher) (1:250x)



176 was used as the secondary antibody. After staining, the spirochetes were fixed with 0.1% formalin.  
177 The resulting fluorescence intensity of spirochetes was measured and analyzed by flow cytometry  
178 using a FACSCalibur (BD Bioscience) as described (2, 4).

179  
180 **Serum resistance assays.** The serum resistance of *B. burgdorferi* was measured as described with  
181 modifications (1, 2, 5). Cultures in mid-log phase of each strain treated with human blood (2), as  
182 well as the high passaged, non-infectious, and serum-sensitive human blood-treated *B. burgdorferi*  
183 strain B313 (control), were cultivated in triplicate and diluted to a final concentration of  $5 \times 10^6$   
184 cells/mL in 100 $\mu$ l of BSK-II medium without rabbit sera. The cell suspensions were mixed with  
185 sera collected from naïve white-footed mice or quail (60% spirochetes and 40% sera) in the  
186 presence or absence of 2 $\mu$ M of CVF (Complement Technology) or recombinant OmCI, to deplete  
187 complement from mouse and quail sera, respectively. Heat-inactivated sera (65°C for 2-h) were  
188 also included in assays assessing OmCI functionality at 11 days post inoculation (dpi).

189 Bacterial survivability was determined by microscopically counting the number of live  
190 bacteria after live/dead staining or by measuring the number of colonies forming units (CFUs)  
191 after plating the sera-spirochete mixtures on agar plates. To determine the number of live bacteria  
192 using live/dead staining, spirochetes incubated with sera at 0- and 4-h were mixed with 1 $\times$  SYBR  
193 Green I (ThermoFisher) and 6 $\mu$ M of propidium iodide (ThermoFisher) in 0.5% BSA in PBS as  
194 described (2, 3, 25). We visualized the live (green) and dead (red) spirochetes using the FITC and  
195 Texas Red filters from an Olympus BX51 fluorescence microscope (Olympus Corporation,  
196 Waltham, MA). To determine the CFUs, aliquots of the sera-spirochete mixtures at 0- and 4-h post  
197 incubation were mixed with 1.8% agarose (BioRad; Hercules, CA), followed by plating on a

198 solidified BSK II/agarose layer in sterilized 100 x 20mm tissue culture dishes (Corning  
199 Incorporated, Corning, NY), as described previously (26, 27). Plates were incubated at 33°C in 5%  
200 CO<sub>2</sub> for two weeks. The percent survival of *Bb* was calculated by the normalization of the number  
201 of live spirochetes or CFUs at 4-h post incubation, to those immediately after incubation with sera  
202 (0-h). We determined the percent survival of the WT B31-A3 and  $\Delta cspZ$ /Vector incubated with  
203 white-footed mouse or quail sera using each of three methodologies. As the results obtained from  
204 these methodologies were comparable (**Fig. S7**), (3), the rest of the serum resistance assays were  
205 performed using live/dead staining.

206

207 **Mouse and quail infection by ticks.** Generating flat, infected *I. scapularis* nymphs has been  
208 described previously (1, 28). The infected nymphs were placed in a chamber to feed on 4- to 6-  
209 week-old male and female BALB/c or C3<sup>-/-</sup> mice in BALB/c background, or on four- to six-week-  
210 old male and female untreated or OmCI-treated quail, as described previously (29). For OmCI-  
211 treatment, the quail were subcutaneously injected with OmCI (1mg/kg of quail) one day prior to  
212 the nymph feeding. Every group had five animals/group, with the following exceptions: (1)  
213 BALB/c blood from the B31-A3 and  $\Delta cspZ$ /Vector groups at 10dpf (**Figs 3F, S10G**), which  
214 included data from initial trial experimentations and totaled six or nine mice per group,  
215 respectively; (2) all tissues from quail infected with  $\Delta cspZ$ /Vector at 9dpf (**Fig S10P-S**) to enhance  
216 the rigor of the work.

217 The engorged nymphs were obtained from the chambers at four days post tick feeding.  
218 Animals were sacrificed, and tissues were collected from the mice at 7-, 10-, or 14dpf (blood, tick  
219 bite site of the skin, heart, bladder, tibiotarsus joint), and quail (blood, tick bite site of the skin,

220 heart, brain) at 9-, or 14dpf-. To ensure OmCI was still functional at these timepoints, quail were  
221 subcutaneously injected with OmCI (1mg/kg of quail) or PBS buffer (control), and the sera were  
222 collected at 10dpi (equivalent to 11dpf). The lack of the ability of this serum to kill the sera-  
223 sensitive *B. burgdorferi* strain B313 (i.e., to ensure complement was still depleted) was assessed  
224 as described in the section “Serum resistance assays” (Fig. S17).

225

226 **Quantification of spirochete burden.** The DNA from tissues, blood, and ticks was extracted as  
227 described previously (29). qPCR was then performed to quantitate spirochete burden using an ABI  
228 7500 Real-Time PCR System (ThermoFisher Scientific) in conjunction with PowerUp SYBR  
229 Green Master Mix (ThermoFisher Scientific). The amplification cycle of the Lyme borreliae *recA*  
230 gene using the primer listed in **Table S8**, as described (2). Although the ratio of the number of  
231 genomes (i.e., the copies of *recA*) to the number of spirochetes is not always equal to one, within  
232 the same life stages or environment, the number of genomes is correlated with the number of  
233 bacteria (30). Therefore, we established a standard curve using a known number of *in vitro*  
234 cultivated *B. burgdorferi* strain B31-A3 to the *recA*-derived threshold cycle (Cq) values. By  
235 applying the Cq values of *recA* derived from the experimental samples, we could extrapolate  
236 relative spirochete burdens in each sample. In a similar manner, we determined the number of  
237 copies of mouse nidogen and quail  $\beta$ -actin for the samples derived from mice and quail,  
238 respectively, using the primers listed in **Table S8**, as described (26, 28, 31, 32). We then  
239 normalized the spirochete burden (*recA* copies) to  $10^4$  copies of mouse nidogen or quail  $\beta$ -actin  
240 for each respective tissue type (Fig. 3E to M, S10-11).

241

242 **Genomic and evolutionary analyses.** To generate the *cspZ* phylogenetic trees, we mined all  
243 publicly available *cspZ* sequences on NCBI as of September 2021, including assembled genomes,  
244 nucleotides, and unassembled genomes on the SRA. To pull *cspZ* from unassembled genomes, the  
245 short reads were aligned to *cspZ* from B31, B379, or B408 with UGENE v39.0 using BWA-MEM  
246 at defaults (33, 34). Strains were removed from the analyses if the coverage was too low, there was  
247 evidence of PCR/sequencing errors (e.g., non-conserved homopolymer length) or multiple CspZ  
248 variants within one strain. All resulting 174 *cspZ* sequences, plus the outgroup strains (*B.*  
249 *spielmanii* A14s accession: EU272854.1; *B. afzelii* FEM4 accession: OM243915; *B. afzelii* VS461  
250 accession: MN809989.1; *B. garinii* PBr accession: CP001307.1; *B. bissetii* DN127 accession:  
251 NC\_015916.1; *B. bissetii* CO275 accession: JNBW01000464.1), were aligned by codons using  
252 TranslatorX (35). All isolates were collapsed into haplotypes in FaBox v1.61, and these haplotypes  
253 were used with the *B. bissetii* outgroup to generate a NeighborNet network in SplitsTree v4 (36,  
254 37). Phylogenetic trees were estimated using likelihood as optimality criterion in IQ-tree v1.6.12  
255 (38) and a full substitution model search procedure in ModelFinder (39). Internode branch support  
256 was estimated with 10,000 replicates of both ultrafast bootstrapping and the SH-aLRT branch test  
257 (38-40). All resulting phylogenetic trees were visualized in iTOL v6.4.3 (41). The pairwise  
258 sequence similarity for each of the 174 *B. burgdorferi* *cspZ* isolates relative to CspZ<sub>B31</sub>, CspZ<sub>B408</sub>,  
259 or CspZ<sub>B379</sub> was determined in MEGA-X with default settings (42). Putative recombination  
260 breakpoints were analyzed with GARD (43), and evidence of selection was determined using  
261 BUSTED (44, 45), FUBAR (46), FEL (47) and MEME (48), all on the Datamonkey server (49).  
262 The ancestor state for the entire *B. burgdorferi* ingroup was reconstructed using the LG model in  
263 GRASP 2020.05.05 (50, 51), as well as FireProt-ASR with default settings (52) using both full

264 and haplotype phylogenies, the multitaxon outgroup, and solely *B. bissetii* as the outgroup.  
265 Divergence dating was carried out in BEAST v1.10.4 (53) using the HKY+ $\Gamma_4$  substitution model  
266 (54, 55), a coalescent Bayesian skyline coalescent model, and a strict clock with a uniform prior  
267 on the substitution rate using the previously determined rate of 4.75e-06 substitutions/site/year  
268 (56). A Markov chain Monte Carlo chain length of 100 million steps was used with a 10,000-step  
269 thinning, resulting in effective sample sizes greater than 200, an indication of an adequate chain  
270 mixing. The analyses were run in triplicate and combined after removing a 10% burn-in.

271         The amino acids encoding SCRs 6-7 from human (GenBank accession U56979.1), mouse  
272 (NM\_009888.3), and quail (XM\_015869474.2) FH, or CspZ<sub>B31</sub>, CspZ<sub>B379</sub>, CspZ<sub>B408</sub>, the loop-  
273 swapped variants, and the reconstructed ancestral CspZ sequences were aligned in MEGA-X using  
274 ClustalW with default settings, analyzed with ESPript v3.0, and visualized with Jalview v2.11.0  
275 (42, 57, 58).

276

277 **Statistical analysis.** Samples were compared using the Mann-Whitney *U* test or the Kruskal-  
278 Wallis test with the two-stage step-up method of Benjamini, Krieger, and Yekutieli (59).

279

280 **Accession numbers.** The coordinates and the structure factors for CspZ<sub>B379</sub>, CspZ<sub>B408</sub>, and human  
281 SCR-CspZ<sub>B408</sub> have been deposited in the Protein Data Bank with accession codes 7ZJJ, 7ZJK,  
282 and 7ZJM, respectively.

283

284

285

286 **SUPPLEMENTAL TABLES**

287 **Table S1: CspZ<sub>B408</sub> residues that bind to human FH based on CspZ<sub>B408</sub>-human SCR6-7**

288 **complex structure and their equivalent residues in CspZ<sub>B31</sub> and CspZ<sub>B379</sub>.**

| <b>CspZ<sub>B408</sub></b> | <b>CspZ<sub>B31</sub></b> | <b>CspZ<sub>B379</sub></b> |
|----------------------------|---------------------------|----------------------------|
| Asp47                      | Asp47                     | Asp47                      |
| Tyr50                      | Tyr50                     | Tyr50                      |
| Asn51                      | Asn51                     | Ser51                      |
| Thr54                      | Thr54                     | Thr54                      |
| Asn58                      | Asn58                     | Asn58                      |
| Thr62                      | Thr62                     | Thr62                      |
| Asp71                      | -                         | -                          |
| Asp73 <sup>a</sup>         | Asp70 <sup>a</sup>        | Asp74 <sup>a</sup>         |
| Ser75 <sup>a</sup>         | Ser72 <sup>a</sup>        | Ser76 <sup>a</sup>         |
| Arg142                     | Arg139                    | Arg143                     |
| Asn183                     | Asn180                    | Asn184                     |
| Tyr214                     | Tyr211                    | Tyr215                     |

289 <sup>a</sup>Interacts with SCR6.

290 **Table S2. CspZ variants differ in binding to Factor H from different animals**

| CspZ variant                           | Factor H source | ELISA <sup>a</sup>           | ----- Surface Plasmon Resonance <sup>b</sup> ----- |                                                                    |                                     |
|----------------------------------------|-----------------|------------------------------|----------------------------------------------------|--------------------------------------------------------------------|-------------------------------------|
|                                        |                 | K <sub>D</sub> (μM)          | K <sub>D</sub> (μM)                                | k <sub>on</sub> (10 <sup>3</sup> s <sup>-1</sup> M <sup>-1</sup> ) | k <sub>off</sub> (s <sup>-1</sup> ) |
| CspZ <sub>B31</sub>                    | Mouse           | <b>0.43±0.74<sup>c</sup></b> | <b>0.20±0.02</b>                                   | 45.78±15.36                                                        | 0.0084±0.0022                       |
|                                        | Quail           | <b>0.91±0.08<sup>d</sup></b> | <b>0.81±0.01</b>                                   | 117.43±3.25                                                        | 0.095±0.0032                        |
| CspZ <sub>B379</sub>                   | Mouse           | <b>n.b.<sup>d</sup></b>      | <b>n.b.</b>                                        | n.b.                                                               | n.b.                                |
|                                        | Quail           | <b>0.59±0.037</b>            | <b>0.75±0.15</b>                                   | 119.83±7.08                                                        | 0.088±0.012                         |
| CspZ <sub>B379</sub> LB <sub>408</sub> | Mouse           | <b>1.39±0.12</b>             | <b>0.90±0.12</b>                                   | 21.16±10.58                                                        | 0.018±0.0094                        |
|                                        | Quail           | <b>n.b.</b>                  | <b>n.b.</b>                                        | n.b.                                                               | n.b.                                |
| CspZ <sub>B408</sub>                   | Mouse           | <b>0.68±0.05</b>             | <b>0.20±0.02</b>                                   | 22.13±1.31                                                         | 0.008±0.002                         |
|                                        | Quail           | <b>n.b.</b>                  | <b>n.b.</b>                                        | n.b.                                                               | n.b.                                |
| CspZ <sub>B408</sub> LB <sub>379</sub> | Mouse           | <b>n.b.</b>                  | <b>n.b.</b>                                        | n.b.                                                               | n.b.                                |
|                                        | Quail           | <b>1.38±0.47</b>             | <b>0.99±0.06</b>                                   | 72.43±2.14                                                         | 0.072±0.006                         |
| GST <sup>e</sup>                       | Mouse           | <b>n.b.</b>                  | <b>n.d.</b>                                        | n.d.                                                               | n.d.                                |
|                                        | Quail           | <b>n.b.</b>                  | <b>n.d.</b>                                        | n.d.                                                               | n.d.                                |

291 All values represent the mean ± SEM of three experiments

292 <sup>a</sup>Determined using GST tagged CspZ variants or mutant proteins.293 <sup>b</sup>Determined using untagged CspZ variants or mutant proteins294 <sup>c</sup>Reported previously in (60)295 <sup>d</sup>No binding activity was detected296 <sup>e</sup>GST was included as a negative control

297 **Table S3. The generation time for *B. burgdorferi* strains used in this study.**

| <b>Strain</b>                                    | <b>Generation time (h)<sup>a, b</sup></b> |
|--------------------------------------------------|-------------------------------------------|
| B31-A3                                           | 16.45 ± 1.38                              |
| B31-A3Δ <i>cspZ</i> /vector                      | 16.42 ± 1.79                              |
| B31-A3Δ <i>cspZ</i> /pCspZ <sub>B31</sub>        | 17.12 ± 1.05                              |
| B31-A3Δ <i>cspZ</i> /pCspZ <sub>B379</sub>       | 16.62 ± 2.07                              |
| B31-A3Δ <i>cspZ</i> /pCspZ <sub>B379</sub> LB408 | 16.40 ± 0.83                              |
| B31-A3Δ <i>cspZ</i> /pCspZ <sub>B408</sub>       | 17.31 ± 0.62                              |
| B31-A3Δ <i>cspZ</i> /pCspZ <sub>B408</sub> LB379 | 18.66 ± 2.06                              |

298 <sup>a</sup>The generation time was calculated as described previously (2).

299 <sup>b</sup>There were no significant differences between generation time of any strain (Kruskal-Wallis test with the two-stage step-up  
 300 method of Benjamini, Krieger, and Yekutieli)

301



302 **Table S4: The percentage of SAPs in CspZ variants**

| <b>Loop type</b>     | <b>Position</b> | <b>AA</b> | <b>%</b> | <b>AA</b> | <b>%</b> |
|----------------------|-----------------|-----------|----------|-----------|----------|
| CspZ <sub>B408</sub> | 20              | Asp       | 64.00    | Asn       | 36.00    |
|                      | 30              | Asp       | 88.00    | Asn       | 36.00    |
|                      | 41              | Val       | 56.00    | Phe       | 44.00    |
|                      | 84              | Phe       | 52.00    | Leu       | 48.00    |
|                      | 95              | Lys       | 92.00    | Asn       | 8.00     |
|                      | 107             | Met       | 56.00    | Ile       | 44.00    |
|                      | 183             | Asp       | 52.00    | Asn       | 48.00    |
| CspZ <sub>B31</sub>  | 30              | Asn       | 88.30    | Asp       | 11.70    |
|                      | 66 <sup>a</sup> | Gly       | 80.85    | Val       | 19.15    |
|                      | 68 <sup>a</sup> | Phe       | 80.85    | Tyr       | 19.15    |
|                      | 81              | Phe       | 88.30    | Leu       | 11.70    |
|                      | 88              | Val       | 98.94    | Ala       | 1.06     |
|                      | 131             | Val       | 94.68    | Ala       | 5.32     |
|                      | 154             | Ser       | 98.64    | Pro       | 1.06     |
|                      | 161             | Lys       | 96.81    | Glu       | 3.19     |
|                      | 203             | Ser       | 98.94    | Lys       | 1.06     |
|                      | 204             | Arg       | 98.94    | Leu       | 1.06     |
|                      | 208             | Asn       | 67.02    | Asp       | 32.98    |
| CspZ <sub>B379</sub> | 30              | Asp       | 87.50    | Asn       | 12.50    |
|                      | 50 <sup>b</sup> | Tyr       | 97.92    | His       | 2.08     |
|                      | 235             | Ile       | 97.92    | Ser       | 2.08     |

303 <sup>a</sup>Part of the loop structures

304 <sup>b</sup>Predicted to directly interact with FH

305

306

307 **Table S5. Estimated diversification times for each lineage.**

| <b>Lineage</b> | <b>Median<sup>a</sup></b> | <b>HPD95%<sup>a</sup></b> |
|----------------|---------------------------|---------------------------|
| CspZ-B31       | 784                       | 263-1860                  |
| CspZ-B379      | 261                       | 59-741                    |
| CspZ-B408      | 671                       | 179-1679                  |

308 <sup>a</sup>Years before present

309

310 **Table S6. CspZ variants differ in binding to Factor H from different animals**

| CspZ variant          | Factor H source | ELISA <sup>a</sup>  | ----- Surface Plasmon Resonance <sup>b</sup> ----- |                                                                    |                                     |
|-----------------------|-----------------|---------------------|----------------------------------------------------|--------------------------------------------------------------------|-------------------------------------|
|                       |                 | K <sub>D</sub> (μM) | K <sub>D</sub> (μM)                                | k <sub>on</sub> (10 <sup>3</sup> s <sup>-1</sup> M <sup>-1</sup> ) | k <sub>off</sub> (s <sup>-1</sup> ) |
| CspZ <sub>B31</sub>   | Human           | <b>0.31±0.03</b>    | <b>0.15±0.07</b>                                   | 27.13±8.10                                                         | 0.0037±0.0010                       |
|                       | Mouse           | <b>0.38±0.07</b>    | <b>0.20±0.02</b>                                   | 45.78±15.36                                                        | 0.0084±0.0022                       |
|                       | Quail           | <b>0.74±0.15</b>    | <b>0.81±0.01</b>                                   | 117.43±3.25                                                        | 0.095±0.0032                        |
| CspZ <sub>LCAS1</sub> | Human           | <b>0.34±0.10</b>    | <b>0.081±0.027</b>                                 | 22.73±2.81                                                         | 0.0018±0.0005                       |
|                       | Mouse           | <b>0.41±0.07</b>    | <b>0.19±0.10</b>                                   | 20.76±2.98                                                         | 0.0041±0.0028                       |
|                       | Quail           | <b>0.77±0.09</b>    | <b>0.91±0.17</b>                                   | 85.00±43.34                                                        | 0.083±0.050                         |
| CspZ <sub>LCAS2</sub> | Human           | <b>0.23±0.02</b>    | <b>0.058±0.02</b>                                  | 24.73±0.40                                                         | 0.0014±0.0004                       |
|                       | Mouse           | <b>0.36±0.05</b>    | <b>0.21±0.03</b>                                   | 25.60±2.35                                                         | 0.0055±0.0007                       |
|                       | Quail           | <b>0.94±0.09</b>    | <b>0.95±0.07</b>                                   | 122.50±11.87                                                       | 0.091±0.063                         |
| CspZ <sub>LCAS3</sub> | Human           | <b>0.25±0.02</b>    | <b>0.073±0.012</b>                                 | 27.56±2.28                                                         | 0.0020±0.0003                       |
|                       | Mouse           | <b>0.53±0.12</b>    | <b>0.19±0.058</b>                                  | 27.36±0.28                                                         | 0.0052±0.0012                       |
|                       | Quail           | <b>0.73±0.06</b>    | <b>0.75±0.28</b>                                   | 132.13±10.09                                                       | 0.082±0.045                         |
| CspZ <sub>LCAS4</sub> | Human           | <b>0.30±0.01</b>    | <b>0.13±0.01</b>                                   | 18.20±0.67                                                         | 0.0022±0.0016                       |
|                       | Mouse           | <b>0.40±0.01</b>    | <b>0.11±0.014</b>                                  | 26.46±0.72                                                         | 0.0029±0.0003                       |
|                       | Quail           | <b>0.93±0.06</b>    | <b>0.61±0.04</b>                                   | 306.0±1.25                                                         | 0.16±0.01                           |
| DbpA <sup>c</sup>     | Human           | n.b. <sup>d</sup>   | n.d. <sup>e</sup>                                  | n.d.                                                               | n.d.                                |
|                       | Mouse           | n.b.                | n.d.                                               | n.d.                                                               | n.d.                                |
|                       | Quail           | n.b.                | n.d.                                               | n.d.                                                               | n.d.                                |

311 All values represent the mean  $\pm$  SEM of three experiments

312 <sup>a</sup>Determined using His tagged CspZ proteins shown in Fig. S14

313 <sup>b</sup>Determined using His tagged CspZ proteins shown in Fig. S14, except for the interactions of CspZ<sub>B31</sub> with mouse and quail FH  
314 shown in Fig. 2A and Table S2

315 <sup>c</sup>His tagged DbpA as a negative control

316 <sup>d</sup>No binding activity was detected

317 <sup>e</sup>Not determined

318

319 **Table S7. The strains and plasmids used in this study.**

| Strain or plasmid                                                    | Genotype or characteristic                                                                                                                                                                                                                     | Source     |
|----------------------------------------------------------------------|------------------------------------------------------------------------------------------------------------------------------------------------------------------------------------------------------------------------------------------------|------------|
| <i>B. burgdorferi</i>                                                |                                                                                                                                                                                                                                                |            |
| B313                                                                 | High-passage <i>B. burgdorferi</i> B31 missing lp5, lp17, lp21, lp25, lp28-1, lp28-2, lp28-3, lp28-4, lp36, lp38, lp54, lp56, cp9, cp32-4, cp32-6, cp32-8, cp32-9                                                                              | (61)       |
| B31-A3                                                               | Clone of <i>B. burgdorferi</i> B31 missing cp9 RST type 1, <i>ospC</i> type A                                                                                                                                                                  | (62)       |
| B379                                                                 | Clone of <i>B. burgdorferi</i> B379 isolated from humans with erythema migrans. RST Type 2, <i>ospC</i> type K                                                                                                                                 | (21)       |
| B408                                                                 | Clone of <i>B. burgdorferi</i> B379 isolated from humans with erythema migrans. RST type 3, <i>ospC</i> type K                                                                                                                                 | (21)       |
| B31-A3 $\Delta$ <i>cspZ</i>                                          | B31-A3 $\Delta$ <i>cspZ</i> ::KanR <sup>a</sup>                                                                                                                                                                                                | (63)       |
| B31-A3 $\Delta$ <i>cspZ</i> /Vector                                  | B31-A3 $\Delta$ <i>cspZ</i> ::KanR carrying plasmid pKFSS                                                                                                                                                                                      | (2)        |
| B31-A3 $\Delta$ <i>cspZ</i> /pCspZ <sub>B31</sub>                    | B31-A3 $\Delta$ <i>cspZ</i> ::KanR complemented with intact <i>cspZ</i> driven by the promoter of <i>cspZ</i> <sub>B31</sub>                                                                                                                   | (2)        |
| B31-A3 $\Delta$ <i>cspZ</i> /pCspZ <sub>B379</sub>                   | B31-A3 $\Delta$ <i>cspZ</i> ::KanR complemented with intact <i>cspZ</i> <sub>B379</sub> driven by the promoter of <i>cspZ</i> <sub>B31</sub>                                                                                                   | This study |
| B31-A3 $\Delta$ <i>cspZ</i> /pCspZ <sub>B408</sub>                   | B31-A3 $\Delta$ <i>cspZ</i> ::KanR complemented with intact <i>cspZ</i> <sub>B408</sub> driven by the promoter of <i>cspZ</i> <sub>B31</sub>                                                                                                   | This study |
| B31-A3 $\Delta$ <i>cspZ</i> /pCspZ <sub>B379</sub> L <sub>B408</sub> | B31-A3 $\Delta$ <i>cspZ</i> ::KanR complemented with intact <i>cspZ</i> <sub>B379</sub> except the residues 190 to 216 replaced by residues 190 to 213 from <i>cspZ</i> <sub>B408</sub> , driven by the promoter of <i>cspZ</i> <sub>B31</sub> | This study |

|                                                                  |                                                                                                                                                                                                                                        |              |
|------------------------------------------------------------------|----------------------------------------------------------------------------------------------------------------------------------------------------------------------------------------------------------------------------------------|--------------|
| B31-<br>A3Δ <i>cspZ</i> /pCspZ <sub>B408</sub> L <sub>B379</sub> | B31-A3Δ <i>cspZ</i> ::KanR complemented with intact <i>cspZ</i> <sub>B408</sub> except the residues 190 to 213 replaced by residues 190 to 216 from <i>cspZ</i> <sub>B379</sub> , driven by the promoter of <i>cspZ</i> <sub>B31</sub> | This study   |
| <hr/> <i>E. coli</i> <hr/>                                       |                                                                                                                                                                                                                                        |              |
| DH5α                                                             | F- Φ80lacZΔM15 Δ(lacZYA-argF) U169 recA1 endA1 hsdR17(rk-, mk+) phoA supE44 thi-1 gyrA96 relA1 λ-                                                                                                                                      | ThermoFisher |
| BL21(DE3)                                                        | F-, ompT hsdSB (rB- mB-) gal dcm (DE3)                                                                                                                                                                                                 | Novagen      |
| BL21(DE3)/pGEX4T2-CspZ <sub>B31</sub>                            | BL21(DE3) producing GST-tagged residues 58 to 711 of CspZ <sub>B31</sub>                                                                                                                                                               | (2)          |
| BL21(DE3)/pGEX4T2-CspZ <sub>B379</sub>                           | BL21(DE3) producing GST-tagged residues 58 to 723 of CspZ <sub>B379</sub>                                                                                                                                                              | This study   |
| BL21(DE3)/pGEX4T2-CspZ <sub>B408</sub>                           | BL21(DE3) producing GST-tagged residues 58 to 720 of CspZ <sub>B408</sub>                                                                                                                                                              | This study   |
| BL21(DE3)/pGEX4T2-CspZ <sub>B379</sub> L <sub>B408</sub>         | BL21(DE3) producing GST-tagged residues 58 to 723 of CspZ <sub>B379</sub> except the residues 190 to 216 replaced by residues 190 to 213 from CspZ <sub>B408</sub>                                                                     | This study   |
| BL21(DE3)/pGEX4T2-CspZ <sub>B408</sub> L <sub>B379</sub>         | BL21(DE3) producing GST-tagged residues 58 to 720 of CspZ <sub>B408</sub> except the residues 190 to 213 replaced by residues 190 to 216 from CspZ <sub>B379</sub>                                                                     | This study   |
| BL21(DE3)/pET15b-DbpA <sub>VS461</sub>                           | BL21(DE3) producing histidine-tagged residues 22 to 170 of DbpA <sub>VS461</sub>                                                                                                                                                       | (64)         |
| BL21(DE3)/pET28a-CspZ-LCAS1                                      | BL21(DE3) producing histidine tagged residue 58 to 711 of CspZ-LCAS1                                                                                                                                                                   | This study   |
| BL21(DE3)/pET28a-CspZ-LCAS2                                      | BL21(DE3) producing histidine tagged residue 58 to 711 of CspZ-LCAS2                                                                                                                                                                   | This study   |

|                             |                                                                                                                                  |                |
|-----------------------------|----------------------------------------------------------------------------------------------------------------------------------|----------------|
| BL21(DE3)/pET28a-CspZ-LCAS3 | BL21(DE3 producing histidine tagged residue 58 to 711 of CspZ-LCAS3                                                              | This study     |
| BL21(DE3)/pET28a-CspZ-LCAS4 | BL21(DE3 producing histidine tagged residue 58 to 711 of CspZ-LCAS4                                                              | This study     |
| Rosetta-gami(DE3)           | F <sup>-</sup> ompT hsdSB (rB <sup>-</sup> mB <sup>-</sup> ) gal dcm lacY1 ahpC (DE3) gor522::Tn10 trxB pRARE (CamR, KanR, TetR) | MilliporeSigma |

---

*P. pastoris*

---

|                |                                                                                            |            |
|----------------|--------------------------------------------------------------------------------------------|------------|
| X-33/FH SCR6-7 | Wild-type Mut+ Pichia strain for expression of FH SCR6-7 (residues 321 to 444 of human FH) | Invitrogen |
|----------------|--------------------------------------------------------------------------------------------|------------|

---

Plasmids

---

|                                                      |                                                                                                                                                                              |               |
|------------------------------------------------------|------------------------------------------------------------------------------------------------------------------------------------------------------------------------------|---------------|
| pJET1.2/Blunt                                        | AmpR <sup>a</sup> ; PCR cloning vector                                                                                                                                       | ThermoFisher  |
| pGEX4T2                                              | AmpR; GST-tagged protein expression vector                                                                                                                                   | Qiagen        |
| pGEX4T2-CspZ                                         | AmpR; pGEX4T2 encoding GST fusion protein residue 58 to 711 of CspZ                                                                                                          | (2)           |
| pGEX4T2-CspZ- CspZ <sub>B379</sub>                   | AmpR; pGEX4T2 encoding GST fusion protein residue 58 to 723 of CspZ <sub>B379</sub>                                                                                          | This study    |
| pGEX4T2-CspZ- CspZ <sub>B408</sub>                   | AmpR; pGEX4T2 encoding GST fusion protein residue 58 to 720 of CspZ <sub>B408</sub>                                                                                          | This study    |
| pGEX4T2-CspZ- CspZ <sub>B379</sub> L <sub>B408</sub> | AmpR; pGEX4T2 encoding GST fusion protein residue 58 to 723 of CspZ <sub>B379</sub> except the residues 190 to 216 replaced by residues 190 to 213 from CspZ <sub>B408</sub> | This study    |
| pGEX4T2-CspZ- CspZ <sub>B408</sub> L <sub>B379</sub> | AmpR; pGEX4T2 encoding GST fusion protein residue 58 to 720 of CspZ <sub>B408</sub> except the residues 190 to 213 replaced by residues 190 to 216 from CspZ <sub>B379</sub> | This study    |
| pET28a                                               | KanR <sup>b</sup> ; Histidine-tagged protein expression vector                                                                                                               | EMD Millipore |

|                                               |                                                                                                                                                                                                                  |            |
|-----------------------------------------------|------------------------------------------------------------------------------------------------------------------------------------------------------------------------------------------------------------------|------------|
| pET28a-CspZ-LCAS1                             | KanR; pET28a encoding histidine protein residues 58 to 711 of the CspZ-LCAS1                                                                                                                                     | This study |
| pET28a-CspZ-LCAS2                             | KanR; pET28a encoding histidine protein residues 58 to 711 of the CspZ-LCAS2                                                                                                                                     | This study |
| pET28a-CspZ-LCAS3                             | KanR; pET28a encoding histidine protein residues 58 to 711 of the CspZ-LCAS3                                                                                                                                     | This study |
| pET28a-CspZ-LCAS4                             | KanR; pET28a encoding histidine protein residues 58 to 711 of the CspZ-LCAS4                                                                                                                                     | This study |
| pKFSS-1                                       | StrR <sup>c</sup> ; <i>Borrelia</i> shuttle vector                                                                                                                                                               | (65)       |
| pKFSS/pCspZ <sub>B31</sub>                    | StrR; pKFSS-1 encoding intact <i>cspZ</i> <sub>B31</sub> , driven by the promoter of <i>cspZ</i> <sub>B31</sub>                                                                                                  | (2)        |
| pKFSS/pCspZ <sub>B379</sub>                   | StrR; pKFSS-1 encoding intact <i>cspZ</i> <sub>B379</sub> , driven by the promoter of <i>cspZ</i> <sub>B31</sub>                                                                                                 | This study |
| pKFSS/pCspZ <sub>B408</sub>                   | StrR; pKFSS-1 encoding intact <i>cspZ</i> <sub>B408</sub> , driven by the promoter of <i>cspZ</i> <sub>B31</sub>                                                                                                 | This study |
| pKFSS/pCspZ <sub>B379</sub> L <sub>B408</sub> | StrR; pKFSS-1 encoding intact <i>cspZ</i> <sub>B379</sub> except the residues 190 to 216 replaced by residues 190 to 213 from <i>cspZ</i> <sub>B408</sub> , driven by the promoter of <i>cspZ</i> <sub>B31</sub> | This study |
| pKFSS/pCspZ <sub>B408</sub> L <sub>B379</sub> | StrR; pKFSS-1 encoding intact <i>cspZ</i> <sub>B408</sub> except the residues 190 to 213 replaced by residues 190 to 216 from <i>cspZ</i> <sub>B379</sub> , driven by the promoter of <i>cspZ</i> <sub>B31</sub> | This study |
| pETm-11/pCspZ <sub>B379</sub>                 | KanR; 6xHis tag expression vector encoding CspZ <sub>B379</sub> residues 23-236                                                                                                                                  | This study |
| pETm-11/pCspZ <sub>B408</sub>                 | KanR; 6xHis tag expression vector encoding CspZ <sub>B408</sub> residues 23-236                                                                                                                                  | This study |
| pPICZ $\alpha$ -FH                            |                                                                                                                                                                                                                  | This study |



Zeocin resistant; yeast expression vector  
encoding SCR6-7 of human FH under  $\alpha$ MF  
secretion signal

---

- 320 <sup>a</sup>Ampicillin resistant
- 321 <sup>b</sup>Kanamycin resistant
- 322 <sup>c</sup>Streptomycin resistant

323 **Table S8. Primers used in this study.**

| <b>Purpose</b>                                                    | <b>Primer</b>           | <b>Sequence</b>                                                       |
|-------------------------------------------------------------------|-------------------------|-----------------------------------------------------------------------|
| qPCR spirochete<br>burden: <i>recA</i>                            | BBRecAfp                | GTGGATCTATTGTATTAGATGAGGCTCTCG                                        |
|                                                                   | BBRecArp                | CAGCAACATGTCTGGCATTAGACAC                                             |
| qPCR for mouse<br>samples: <i>mouse</i><br><i>nidogen</i>         | mNidfp                  | CCAGCCACAGAATCCCATCC                                                  |
|                                                                   | mNidrp                  | GGACATACTCTGCTGCCATC                                                  |
| qPCR for quail<br>samples: <i>quail</i> $\beta$ -<br><i>actin</i> | q $\beta$ -actinfp      | CTGGCACCTAGCACAATGAA                                                  |
|                                                                   | q $\beta$ -actinrp      | CTGCTTGCTGATCCACATCT                                                  |
| qPCR dosage<br>effects: <i>colE1</i>                              | BBColE1fp               | CTACATACCTCGCTCTGCTAATC                                               |
|                                                                   | BBColE1rp               | CGAAACCCGACAGGACTATAAA                                                |
| qPCR dosage<br>effects: <i>bbh17</i>                              | BBBbh17fp               | AACACTATCTTAAATGTCCCCACAA                                             |
|                                                                   | BBBbh17rp               | GTGGAAGAGTGGTTATGGTCAATTTT                                            |
| Generate B379LB408:<br>SLIM step 1                                | B379LB408_A-1_mtsengtd  | CAGAAGATGTGTTACCTTCCGAAGTCATATAAGTCATAATATC<br>ATTATATGCTCCTGTA       |
|                                                                   | B379LB408_B-1_mtsengtd  | TATGACTTATATGACTTCGGAAGGTAACACATCTTCTGATAAA<br>AGTAAGGTTAATCAAG       |
|                                                                   | B379LB408_C-1_mtsengtd  | ATATCATTATATGCTCCTGTA                                                 |
|                                                                   | B379LB408_D-1_mtsengtd  | ATAAAAGTAAGGTTAATCAAG                                                 |
| Generate B379LB408:<br>SLIM step 2                                | B379LB408_A-2_tsennngtd | TTTTATCAGAATCTGTGTTATTACCTTCCGAAGTATAAGTCATA<br>ATATCATTATATGCTCCTGTA |
|                                                                   | B379LB408_B-2_tsennngtd | TATGACTTATACTTCGGAAGGTAATAACACAGATTCTGATAAA<br>AGTAAGGTTAATCAAGCTATAT |
|                                                                   | B379LB408_C-2_tsennngtd | ATATCATTATATGCTCCTGTA                                                 |
|                                                                   | B379LB408_D-2_tsennngtd | GTAAGGTTAATCAAGCTATAT                                                 |
| Generate B379LB408:<br>SLIM step 3                                | B379LB408_A-3_sevnnvtd  | CAGAATCTGTAACGTTATTA ACTTCCGAATAAGTCATAATATCA<br>TTATATGCTCCTGTA      |

|                                                                                       |                                       |                                                                        |
|---------------------------------------------------------------------------------------|---------------------------------------|------------------------------------------------------------------------|
|                                                                                       | B379LB408_B-3_sevnnvtd                | TATGACTTATTCGGAAGTTAATAACGTTACAGATTCTGATAAA<br>AGTAAGGTTAATCAAG        |
|                                                                                       | B379LB408_C-3_sevnnvtd                | ATATCATTATATGCTCCTGTA                                                  |
|                                                                                       | B379LB408_D-3_sevnnvtd                | ATAAAAGTAAGGTTAATCAAG                                                  |
| Generate SLIM step 1                                                                  | B408LB379_A-1_tsennngtd               | CAGAATCTGTACCGTTATTTTCCGAAGTATAAGTCATAATATCA<br>TTATATGCTTCTGTA        |
|                                                                                       | B408LB379_B-1_tsennngtd               | TATGACTTATACTTCGGAAAATAACGGTACAGATTCTGATAAA<br>AGTAAGGTTAATCAAG        |
|                                                                                       | B408LB379_C-1_tsennngtd               | ATATCATTATATGCTTCTGTA                                                  |
|                                                                                       | B408LB379_D-1_tsennngtd               | TAAAAGTAAGGTTAATCAAG                                                   |
| Generate SLIM step 2                                                                  | B408LB379_A-2_mtsengts                | TTTTATCAGAAGATGTACCGTTTTTCCGAAGTCATATAAGTCATA<br>ATATCATTATATGCTTCTGTA |
|                                                                                       | B408LB379_B-2_mtsengts                | TATGACTTATATGACTTCGGAAAACGGTACATCTTCTGATAAA<br>AGTAAGGTTAATCAAGCTATAT  |
|                                                                                       | B408LB379_C-2_mtsengts                | ATATCATTATATGCTTCTGTA                                                  |
|                                                                                       | B408LB379_D-2_mtsengts                | GTAAGGTTAATCAAGCTATAT                                                  |
| Generate SLIM step 3                                                                  | B408LB379_A-3_imtysegts               | AAGATGTACCTTCCGAATAAGTCATAATATAAGTCATAATATC<br>ATTATATGCTTCTGTA        |
|                                                                                       | B408LB379_B-3_imtysegts               | TATGACTTATATTATGACTTATTCGGAAGGTACATCTTCTGATA<br>AAAGTAAGGTTAATC        |
|                                                                                       | B408LB379_C-3_imtysegts               | ATATCATTATATGCTTCTGTA                                                  |
|                                                                                       | B408LB379_D-3_imtysegts               | CTGATAAAAGTAAGGTTAATC                                                  |
| Generate CspZ <sub>B379</sub> residues 23-236 or CspZ <sub>B408</sub> residues 23-236 | <i>cspZ</i> Forw.<br><i>cspZ</i> Rev. | CATGCCATGGGCAGATTAATCAGAGAAAT<br>GCTTGCGGCCGCTTATAATAAAGTTTGCTTAAT     |

325 **Table S9. Data processing, refinement, and validation statistics of crystal structures.**

| Dataset                              | CspZ <sub>B408</sub>      | CspZ <sub>B379</sub>           | CspZ <sub>B408-SCR6-7</sub>                   |
|--------------------------------------|---------------------------|--------------------------------|-----------------------------------------------|
| X-ray diffraction data               |                           |                                |                                               |
| PDB entry                            | 7ZJK                      | 7ZJJ                           | 7ZJM                                          |
| Beamline                             | BESSY II<br>beamline 14.1 | BESSY II<br>beamline 14.1      | BESSY II<br>beamline 14.1                     |
| Space group                          | P2 <sub>1</sub>           | P2 <sub>2</sub> 2 <sub>1</sub> | P2 <sub>1</sub> 2 <sub>1</sub> 2 <sub>1</sub> |
| <i>a</i> , <i>b</i> , <i>c</i> (Å)   | 47.63, 87.49,<br>48.86    | 53.60, 59.95,<br>61.05         | 42.10, 71.07,<br>147.75                       |
| <i>α</i> , <i>β</i> , <i>γ</i> (°)   | 90.0, 97.1, 90.0          | 90.0, 90.0, 90.0               | 90.0, 90.0, 90.0                              |
| Wavelength (Å)                       | 0.9798                    | 0.9762                         | 0.9798                                        |
| Resolution (Å)                       | 48.49-2.45                | 61.05-2.10                     | 73.87-2.59                                    |
| Highest resolution bin (Å)           | 2.55-2.45                 | 2.16-2.10                      | 2.65-2.59                                     |
| No. of reflections                   | 97062                     | 127094                         | 101717                                        |
| No. of unique reflections            | 14406                     | 11805                          | 14404                                         |
| Completeness (%)                     | 98.2 (88.4) <sup>a</sup>  | 98.9 (99.5)                    | 99.8 (99.8)                                   |
| R <sub>merge</sub>                   | 0.09 (0.38)               | 0.10 (0.35)                    | 0.11 (0.38)                                   |
| CC <sub>1/2</sub>                    | 0.997 (0.940)             | 0.998 (0.985)                  | 0.988 (0.926)                                 |
| <i>I</i> / <i>σ</i> ( <i>I</i> )     | 12.1 (4.2)                | 14.8 (6.3)                     | 12.8 (4.9)                                    |
| Multiplicity                         | 6.7 (6.2)                 | 10.8 (11.1)                    | 7.1 (7.5)                                     |
| Refinement                           |                           |                                |                                               |
| R <sub>work</sub>                    | 0.193 (0.248)             | 0.208 (0.371)                  | 0.217 (0.270)                                 |
| R <sub>free</sub>                    | 0.262 (0.399)             | 0.262 (0.431)                  | 0.275 (0.354)                                 |
| Average B-factor (Å <sup>2</sup> )   |                           |                                |                                               |
| Overall                              | 45.1                      | 33.0                           | 31.9                                          |
| From Wilson plot                     | 36.9                      | 15.9                           | 24.1                                          |
| No. of atoms                         |                           |                                |                                               |
| Protein                              | 3592                      | 1769                           | 1914                                          |
| RMS deviations from ideal            |                           |                                |                                               |
| Bond lengths (Å)                     | 0.007                     | 0.008                          | 0.010                                         |
| Bond angles (°)                      | 1.435                     | 1.541                          | 1.548                                         |
| Ramachandran outliers (%)            |                           |                                |                                               |
| Residues in most favored regions (%) | 93.74                     | 95.31                          | 94.93                                         |
| Residues in allowed regions (%)      | 5.10                      | 4.69                           | 4.17                                          |
| Outliers (%)                         | 1.16                      | 0.00                           | 0.90                                          |

326 <sup>a</sup>Values in parentheses are for the highest resolution bin.

327 **Table S10. pKFSS-1:lp28-3 ratio during *in vitro* culture and in the heart of BALB/c mice and quail at 21dpf<sup>a</sup>.**

| Strain                                  | Copies/500pg DNA <sup>b</sup> |                 |                               | Copies/100ng DNA <sup>c</sup> |              |                               |              |               |                  |
|-----------------------------------------|-------------------------------|-----------------|-------------------------------|-------------------------------|--------------|-------------------------------|--------------|---------------|------------------|
|                                         | <i>In vitro</i>               |                 |                               | BALB/c Heart                  |              |                               | Quail Heart  |               |                  |
| B31-A3Δ <i>cspZ</i> /                   | pKFSS                         | lp28-3          | pKFSS/<br>lp28-3 <sup>d</sup> | pKFSS                         | lp28-3       | pKFSS/<br>lp28-3 <sup>f</sup> | pKFSS        | lp28-3        | pKFSS/<br>lp28-3 |
| pCspZ <sub>B31</sub>                    | 37173±<br>6331                | 43268±<br>3656  | <b>0.85</b>                   | 1294±<br>404                  | 1349±<br>210 | <b>0.95</b>                   | 1748±<br>549 | 1809±<br>331  | <b>0.96</b>      |
| pCspZ <sub>B379</sub>                   | 39782±<br>7119                | 41163±<br>7168  | <b>0.96</b>                   | 139±<br>54                    | 133±<br>15   | <b>1.04</b>                   | 430±<br>84   | 431±<br>54    | <b>0.99</b>      |
| pCspZ <sub>B408</sub>                   | 41823±<br>1686                | 42614±<br>12255 | <b>0.98</b>                   | 927±<br>126                   | 955±<br>79   | <b>0.97</b>                   | 38.5±<br>7.6 | 38.1±<br>7.8  | <b>1.00</b>      |
| pCspZ <sub>B379</sub> L <sub>B408</sub> | 50823±<br>5142                | 57618±<br>15430 | <b>0.88</b>                   | 1362±<br>419                  | 1321±<br>606 | <b>1.03</b>                   | 15.2±<br>3.8 | 14.8±<br>5.0  | <b>1.02</b>      |
| pCspZ <sub>B408</sub> L <sub>B379</sub> | 37433±<br>2773                | 42151±<br>4658  | <b>0.88</b>                   | 23.1±<br>5.1                  | 20.8±<br>3.6 | <b>1.11</b>                   | 2658±<br>416 | 3145±<br>1220 | <b>0.84</b>      |

328 <sup>a</sup> Experiment displayed in Figure 3

329 <sup>b</sup> The copy number of pKFSS or lp28-3 was determined by qPCR; shown are the mean ± SEM from three *in vitro* cultures per  
330 spirochete strain

331 <sup>c</sup> The copy number of pKFSS or lp28-3 was determined by qPCR; shown are the mean ± SEM from the hearts from five BALB/c  
332 mice or quail

333 <sup>d</sup> Ratio of the copy number determined using *colE1* primers to the copy number determined using *bbh17* primers

334

335



343 the high-resolution structure of CspZ<sub>B408</sub>. The yellow and blue shading are indicative of loci  
344 showing evidence of positive and negative selection, respectively.

345

346

347

348

349

350

351

352

353

354

355

356

357

358

359

360

361

362

363

364

**A.**

CspZ<sub>B379</sub>

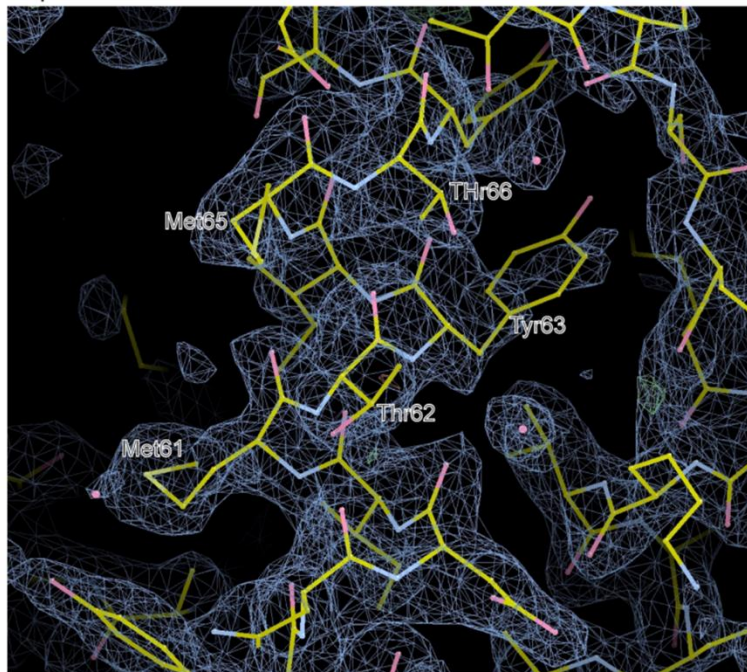

**B.**

CspZ<sub>B408</sub>

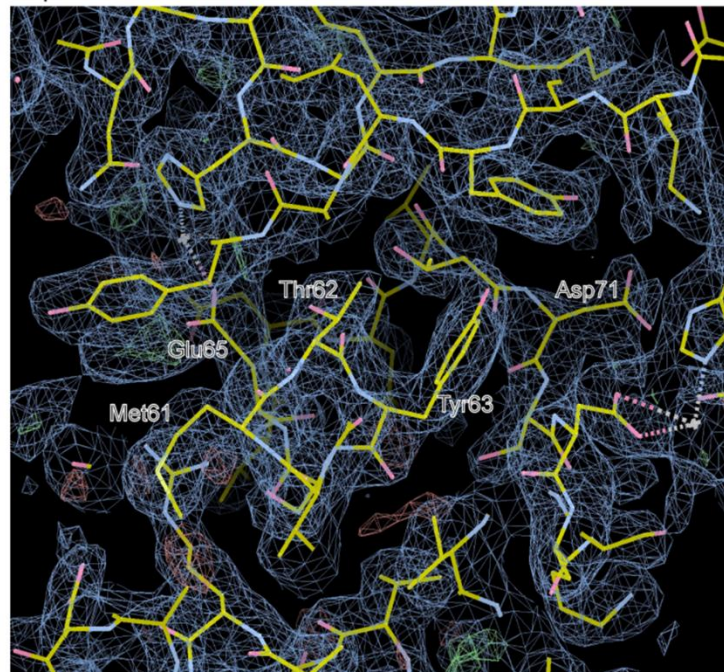

365

366 **Figure S2. Electron density map of crystallization structures.** 2mF<sub>o</sub>-DF<sub>c</sub> electron density map contoured at 1.0σ located on

367 α-helix B and the loop region of (A) CspZ<sub>B379</sub> and (B) CspZ<sub>B408</sub>, representing protein residues as a stick model.

368

369

370



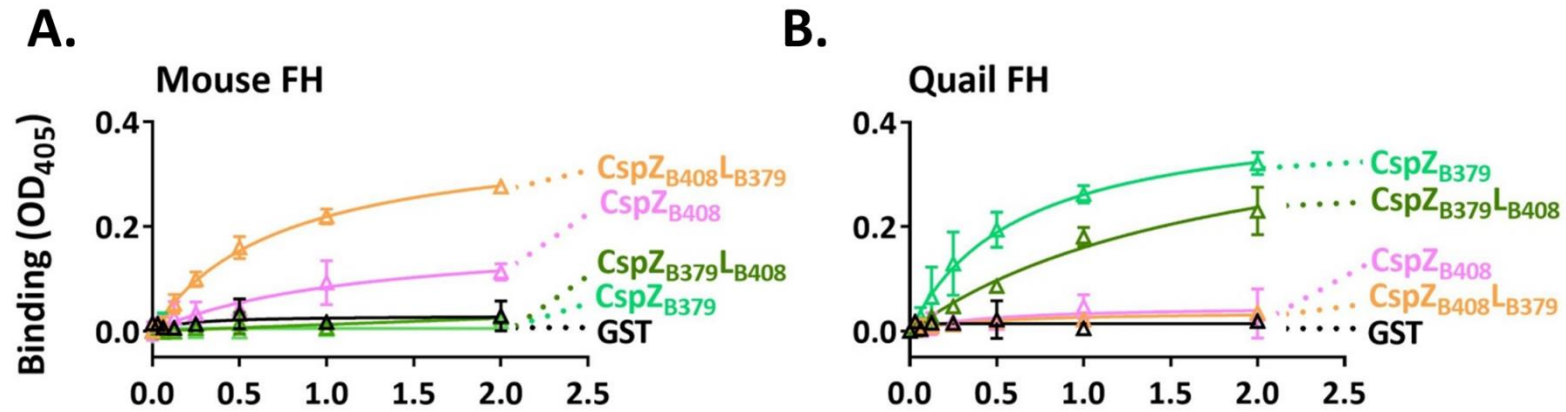

371

372 **Figure S3. The polymorphic loop structures in recombinant CspZ proteins promote host-specific FH-binding ability**

373 **determined by ELISA.** The indicated concentrations of recombinant GST-tagged CspZ<sub>B379</sub>, CspZ<sub>B408</sub>, CspZ<sub>B379</sub>L<sub>B408</sub>, or

374 CspZ<sub>B408</sub>L<sub>B379</sub>, or GST (negative control) were added to triplicate wells coated with FH from mouse or quail, and protein binding

375 was quantitated by ELISA. The experiments were performed with a single preparation of recombinant proteins tested in three

376 independent iterations, in which samples were ran in duplicate. The  $K_D$  values (**Table S2**) representing the FH-binding affinity

377 of each protein were determined from the average of three experiments. Shown is a representative iteration averaging the

378 duplicates.

379

380

381

**A.**

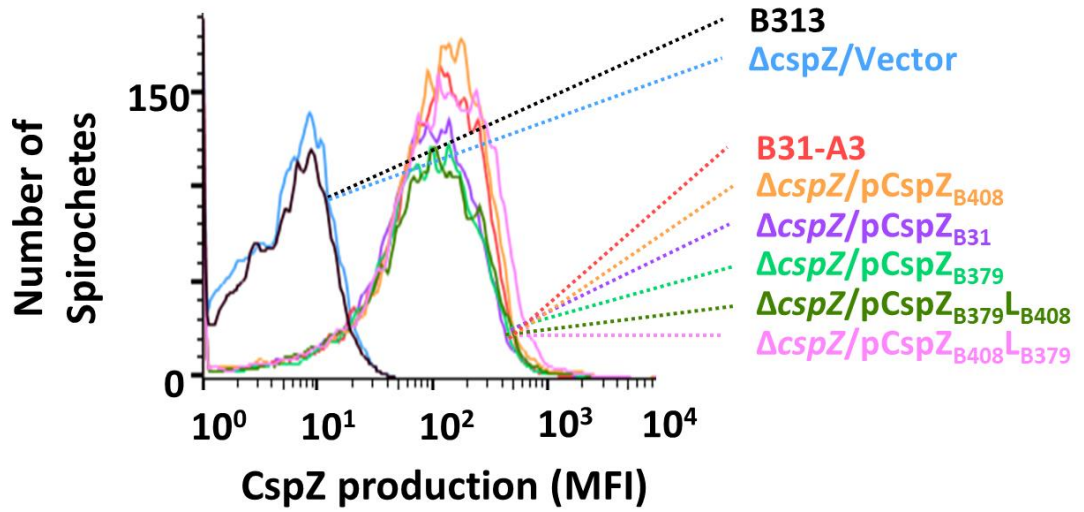

**B.**

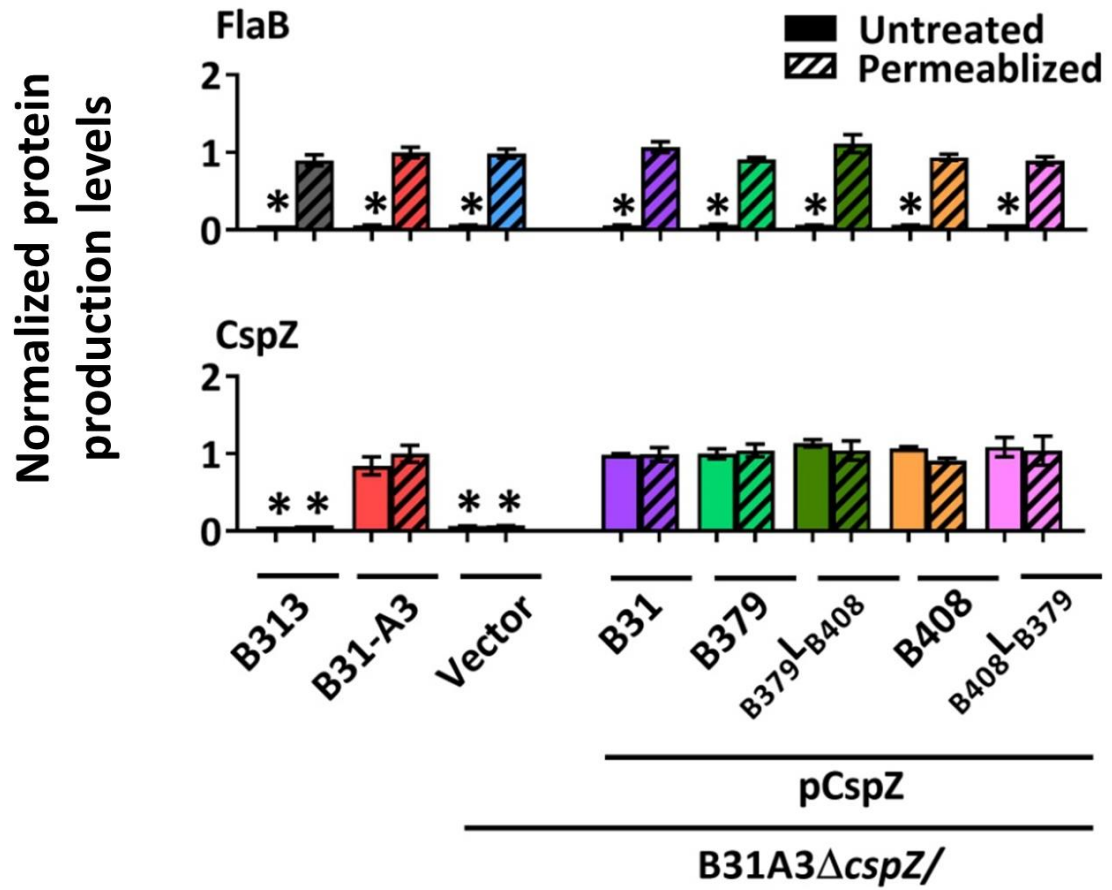

383 **Figure S4. Indistinguishable surface production of CspZ among *B. burgdorferi* strains was**  
384 **observed using flow cytometry.** Flow cytometry analysis of CspZ localized on the surface of *B.*  
385 *burgdorferi* strains B31-A3, B31-A3 $\Delta$ *cspZ* harboring the vector pKFSS (“ $\Delta$ *cspZ*/Vector”), or this  
386 *cspZ* mutant strain producing CspZ<sub>B31</sub>, CspZ<sub>B379</sub>, CspZ<sub>B379</sub>LB408, CspA<sub>B408</sub>, or CspZ<sub>B408</sub>LB379. **(A)**  
387 Representative histograms of flow cytometry analysis showing the levels of CspZ surface  
388 production on the indicated strains. **(B)** The production of FlaB (negative control) and CspZ on  
389 the surface of indicated *B. burgdorferi* strains was detected by flow cytometry. Values are shown  
390 normalized to the production levels of FlaB or CspZ on the surface of permeabilized B31-A3. Each  
391 bar represents the mean of four independent experiments  $\pm$  the standard deviation. An asterisk (\*)  
392 indicates that relative surface production of the indicated proteins was significantly lower ( $p <$   
393 0.05, Kruskal-Wallis test with the two-stage step-up method of Benjamini, Krieger, and Yekutieli)  
394 than that of permeabilized FlaB or CspZ by B31-A3.

395

396

397

398

399

400

401

402

403

404

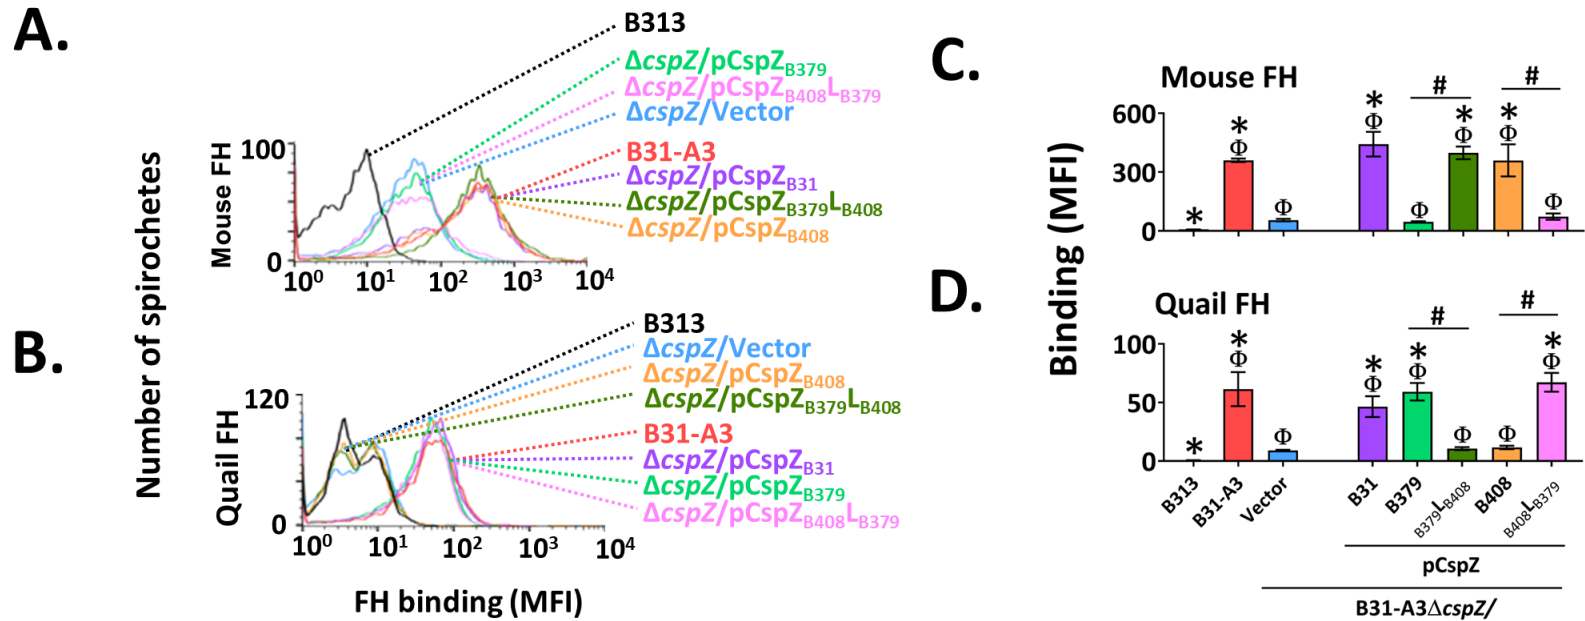

405

406 **Figure S5. The polymorphic CspZ loop determines the host-specific, allelically variable FH-binding activity on spirochete**  
 407 **surface.** *B. burgdorferi* strains B313 (negative control), B31-A3, B31-A3 $\Delta cspZ$  harboring the empty vector pKFSS  
 408 (“ $\Delta cspZ/Vector$ ”), or this mutant strain producing CspZ<sub>B31</sub>, CspZ<sub>B379</sub>, CspZ<sub>B379L<sub>B408</sub></sub>, CspZ<sub>B408</sub>, or CspZ<sub>B408L<sub>B379</sub></sub>, was incubated  
 409 with mouse or quail FH. The bacteria were stained with antibodies that recognize these FH variants prior to flow cytometry.  
 410 Shown are the representative histograms of flow cytometry analysis presenting the levels of FH from (A) mouse or (B) quail  
 411 binding to each *B. burgdorferi* strain. The levels of (C) mouse or (D) quail FH-binding were measured by flow cytometry and  
 412 presented as mean fluorescence index (MFI). Each bar represents the mean of three independent experiments  $\pm$  SEM. Significant

413 differences ( $p < 0.05$ , Kruskal-Wallis test with the two-stage step-up method of Benjamini, Krieger, and Yekutieli) in the levels  
414 of FH-binding relative to the B313/Vector (“Φ”),  $\Delta cspZ$ /Vector (“\*”), or between two strains relative to each other (“#”) are  
415 indicated.

416

417

418

419

420

421

422

423

424

425

426

427

428

429

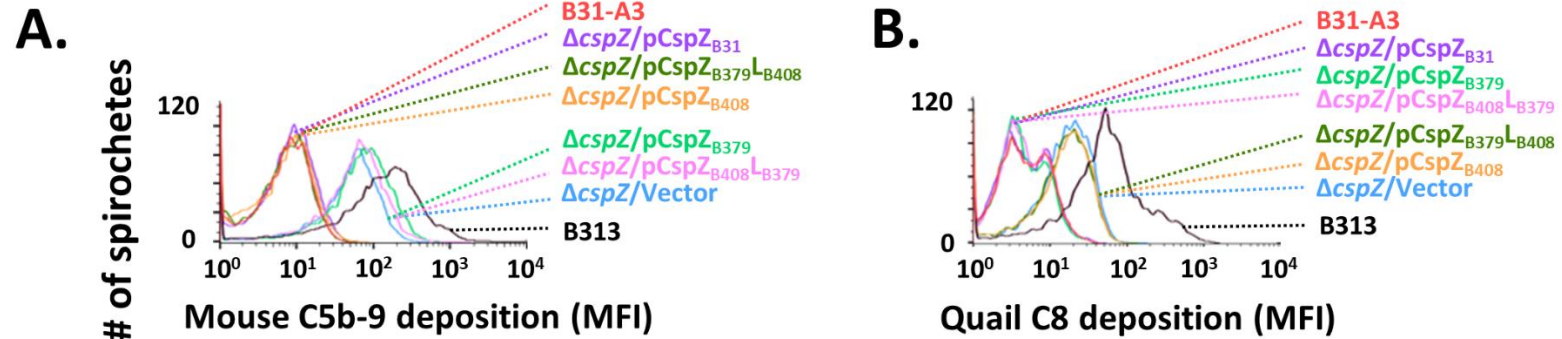

430

431 **Figure S6. The CspZ loop-driven, variable FH-binding activity reduces host-specific complement deposition. B.**

432 *burgdorferi* strains B313 (negative control), B31-A3, B31-A3 $\Delta$ cspZ harboring the empty vector pKFSS-1 (“ $\Delta$ cspZ/Vector”), or

433 this mutant strain producing CspZ<sub>B31</sub>, CspZ<sub>B379</sub>, CspZ<sub>B379L<sub>B408</sub></sub>, CspZ<sub>B408</sub>, or CspZ<sub>B408L<sub>B379</sub></sub>, was incubated with 20% (A) mouse

434 or (B) quail sera, followed by straining with antibodies against mouse C5b-9 or quail C8. Shown are the representative histograms

435 of flow cytometry analysis presenting the deposition levels of (A) mouse C5b-9 or (B) quail C8 on the surface of the indicated

436 strains.

437

438

439

440

441

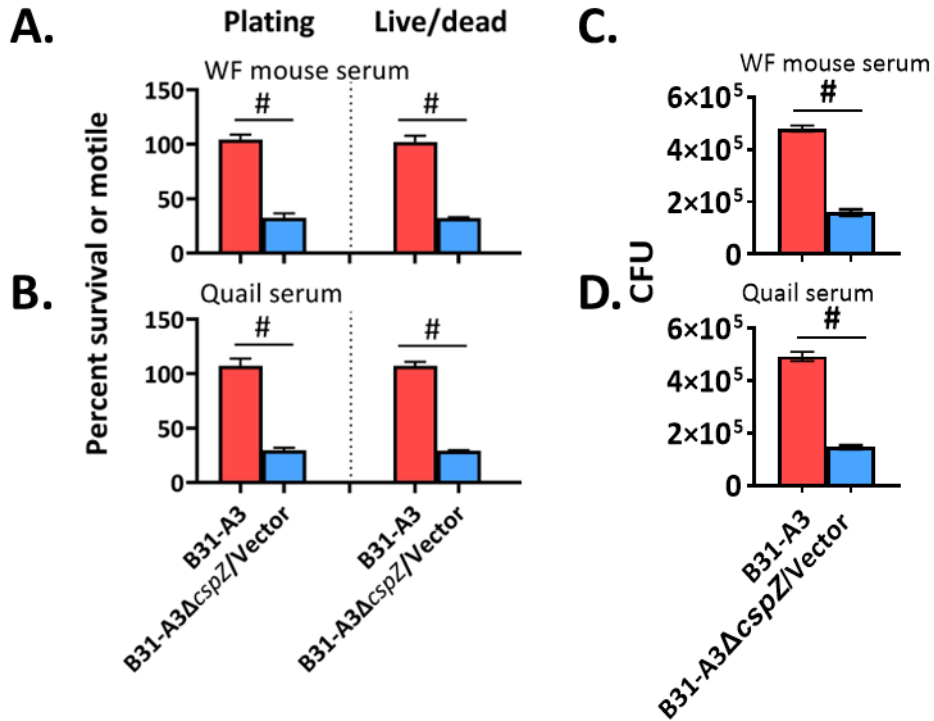

442

443 **Figure S7. No difference of *B. burgdorferi* strains survival in white-footed mouse and quail**

444 **sera determined by colony forming units on agar plates vs. Live/Dead staining.** The indicated

445 *B. burgdorferi* strains were incubated for 4-h with (A and C) white-footed mouse, (B and D) quail,

446 to a final concentration of 40%. The spirochete survival was obtained by counting the CFU on the

447 agar plates (“Plating”) or applying live/dead staining and microscopically counting the number of

448 live spirochetes (“Live/dead”). (A and B) The percentage of survival was calculated using the

449 number of colony forming units or the number of live spirochetes at 4-h post incubation normalized

450 to that prior to the incubation with serum (0-h). (C and D) The number of CFU of the spirochetes

451 determined by plating the spirochete-sera mixtures at 4-h post incubation were shown. Each bar

452 represents the mean of three independent experiments ( $n = 3$ )  $\pm$  SEM. Significant differences ( $p <$

453 0.05, Mann-Whitney test) in the percent survival between spirochetes strains are indicated (“#”).

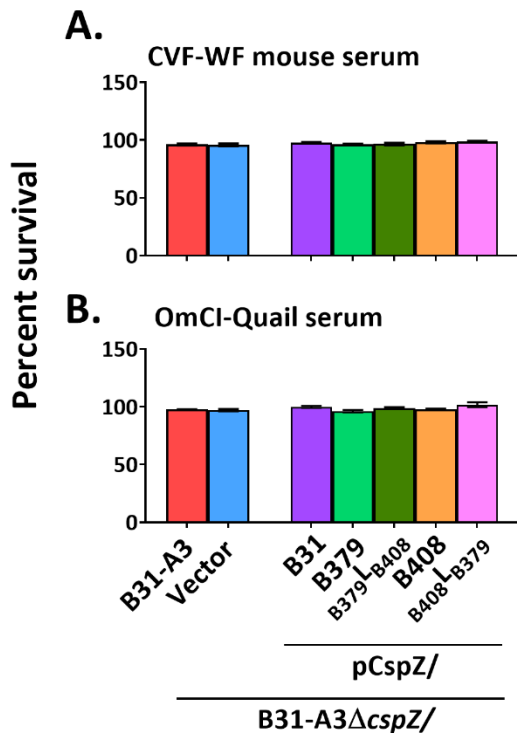

454

455 **Figure S8. The CspZ loop-driven, host-specific serum resistance is recovered in complement-**

456 **depleted sera.** The indicated *B. burgdorferi* strains were incubated for 4-h with complement-

457 depleted (A) mouse (“CVF-WF mouse serum”) or (B) quail (“OMCI-quail serum”) sera, to a final

458 concentration of 40%. The levels of spirochete survival were determined by applying live/dead

459 staining and microscopically counting the number of live spirochetes. The percentage of survival

460 was calculated using the number of live spirochetes at 4-h post incubation normalized to that prior

461 to the incubation with serum (0-h). Each bar represents the mean of three independent experiments

462 ( $n = 3$ )  $\pm$  SEM. Significant differences ( $p < 0.05$ , Mann-Whitney test) in the percent survival

463 between spirochetes strains are indicated (“#”).

464



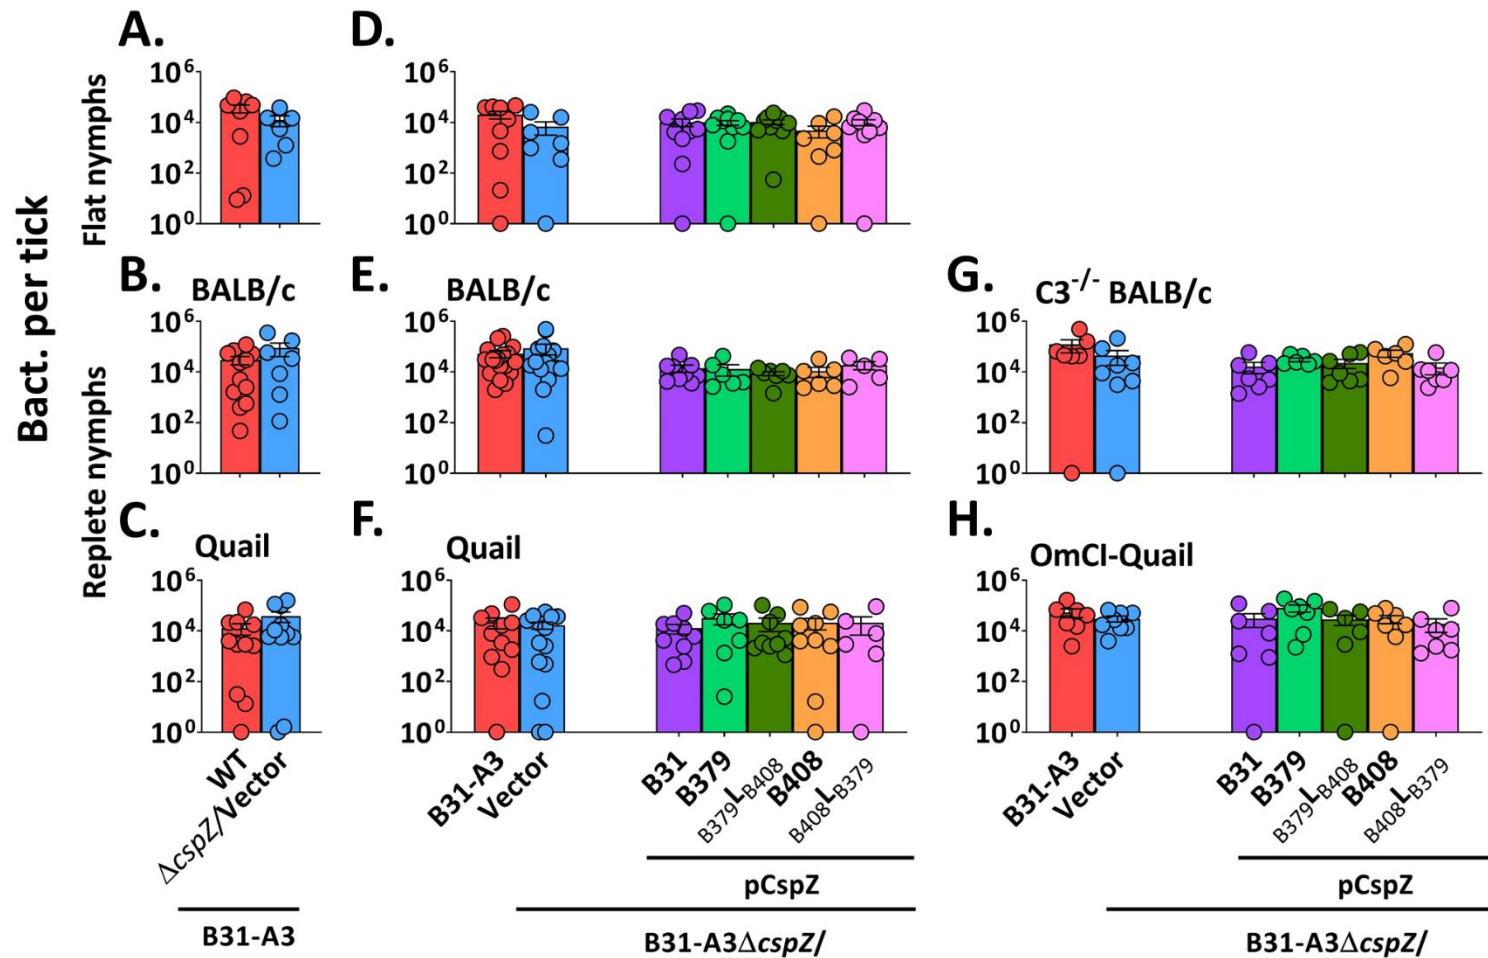

465

466

467 **Figure S9. *B. burgdorferi* strains exhibit similar burdens in flat and fed nymphs. *B. burgdorferi*-infected (A) flat nymphs**

468 **were allowed to feed to repletion on (B, E) BALB/c or (G) C3<sup>-/-</sup> BALB/c mice, or (C, F) quail or (H) OmCI-treated quail. The**

469 spirochete loads in **(A, D)** flat or **(B, C, E, F, G, H)** replate nymphs were determined by qPCR. Shown are the geometric mean  
470  $\pm$  geometric standard deviation of at least five nymphs per group. There was no statistical difference ( $p > 0.05$ ) of the spirochete  
471 burdens between different groups of the replete ticks using a **(A to C)** Mann-Whitney test or **(D to H)** Kruskal-Wallis test with  
472 the two-stage step-up method of Benjamini, Krieger, and Yekutieli.

473

474

475

476

477

478

479

480

481

482

483

484

485

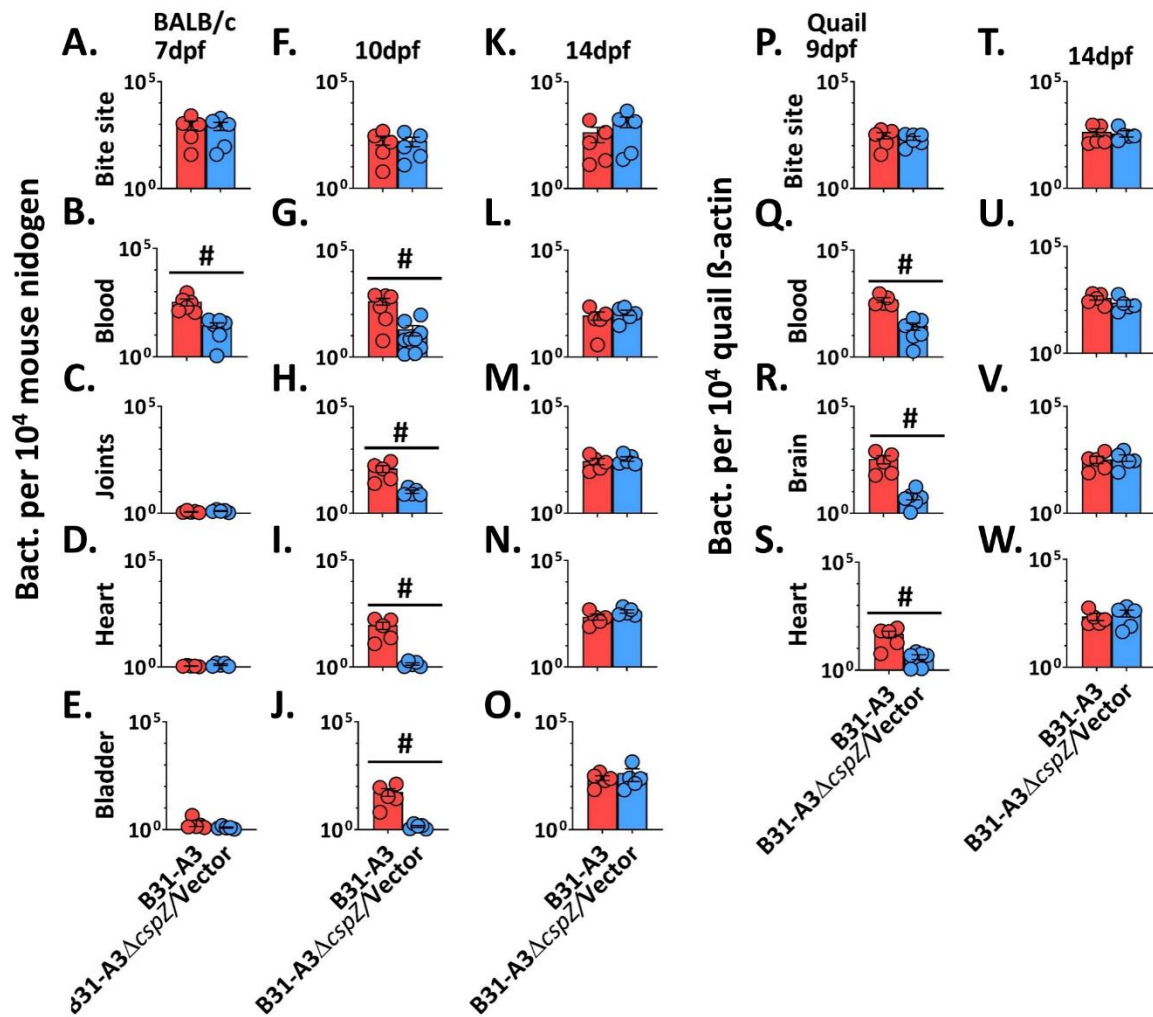

486

487 **Figure S10. CspZ facilitates early bacteremia and distal tissue colonization during tick**

488 **infection.** The *I. scapularis* nymphs carrying *B. burgdorferi* strain B31-A3 or B31-A3Δ*cspZ*

489 harboring the vector pKFSS (“Δ*cspZ*/Vector”) were allowed to feed until repletion on (A to O)

490 BALB/c mice or (P to W) quail. The mice were euthanized at (A to E) 7, (F to J) 10, or (K to O)

491 14 days post nymphs feeding (dpf), whereas the quail were euthanized at (P to S) 9 or (T to W)

492 14dpf. (A, F, K) The site of the skin where nymphs fed (“Bite site”), (B, G, L) blood, (C, H, M)

493 tibiotarsus joints, (D, I, N) heart, and (E, J, O) bladder of mice; and (P, T) the bite site, (Q, U)

494 blood, (R, V) brain, and (S, W) heart of quail, were collected immediately after euthanasia and

495 spirochete loads were determined by qPCR. The *recA* copies were normalized to 10<sup>4</sup> copies of (A  
496 **to O**) mouse nidogen or (**P to W**) quail  $\beta$ -actin. Shown are the geometric mean of bacterial loads  
497  $\pm$  SEM of five animals per group, except for all tissues from quail infected with  $\Delta cspZ$ /Vector\_at  
498 9dpf, which has six. Significant differences ( $p < 0.05$ , Mann-Whitney test) in the spirochete  
499 burdens between two strains relative to each other are indicated (“#”).

500

501

502

503

504

505

506

507

508

509

510

511

512

513

514

515

516

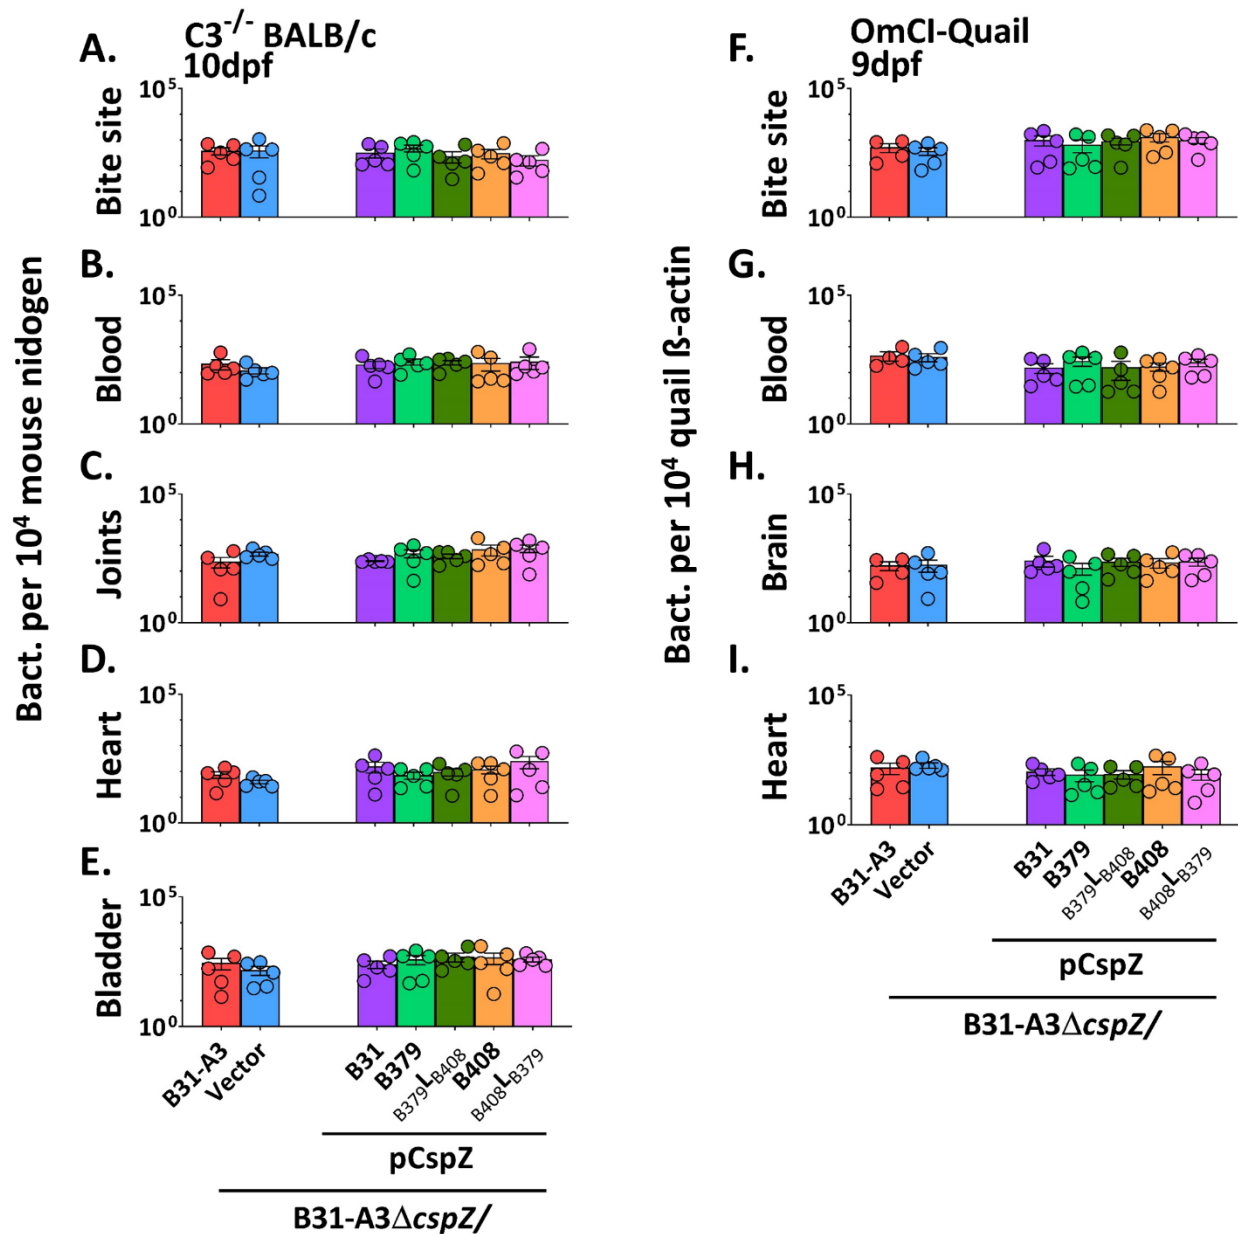

517

518 **Figure S11. The CspZ loop-mediated early hematogenous dissemination is recovered when**

519 **complement is depleted from hosts. *I. scapularis* nymphs carrying B31-A3, B31-A3ΔcspZ**

520 **harboring the empty vector pKFSS (“ΔcspZ/Vector”), or this *cspZ* mutant strain producing**

521 **CspZ<sub>B31</sub>, CspZ<sub>B379</sub>, CspZ<sub>B379LB408</sub>, CspZ<sub>B408</sub>, or CspZ<sub>B408LB379</sub> were allowed to feed until repletion**

522 **on (A to E) C3<sup>-/-</sup> mice in a BALB/c background or (F to I) OmCI-treated quail, both of which**

523 deplete complement in the respective hosts. The *recA* copies in the indicated distal tissues were  
524 normalized to  $10^4$  copies of (A to E) mouse nidogen at 10 days post nymphs feeding (dpf), or (F  
525 to I) quail  $\beta$ -actin, at 9dpf. Shown are the geometric mean of bacterial loads  $\pm$  SEM of five animals  
526 per group. There were no significant differences ( $p < 0.05$ , Kruskal-Wallis test with the two-stage  
527 step-up method of Benjamini, Krieger, and Yekutieli) in the spirochete burdens for any strain.

528

529

530

531

532

533

534

535

536

537

538

539

540

541

542

543

544

545

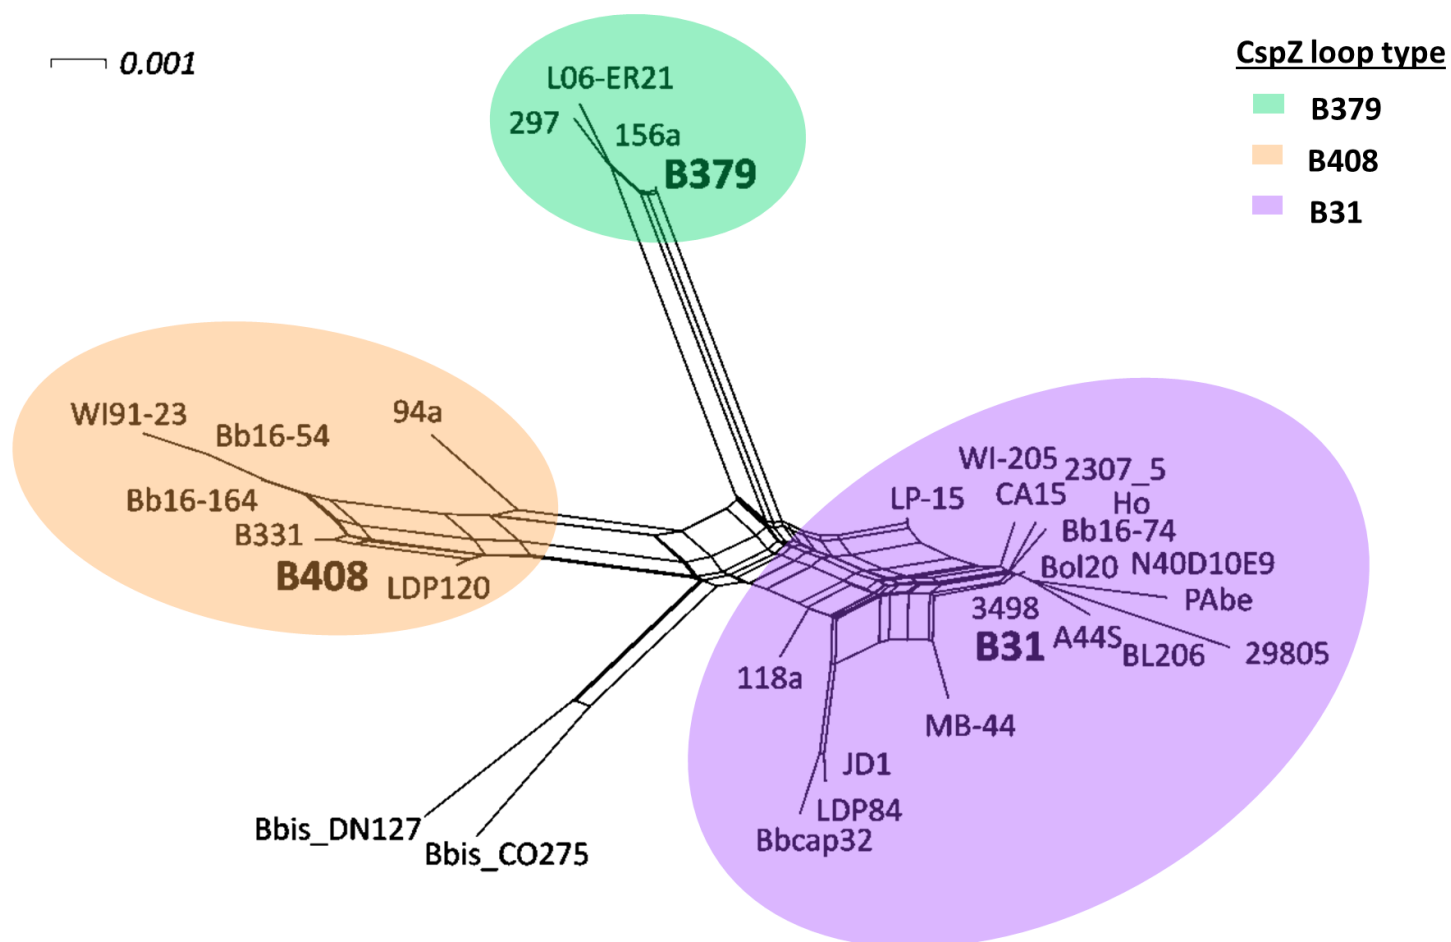

546

547 **Figure S12. Phylogenetic network of *cspZ* haplotypes.** Edges are colored based on their loop structure (CspZ<sub>B379</sub>, CspZ<sub>B408</sub>,

548 and CspZ<sub>B31</sub> in green, orange, and purple, respectively).

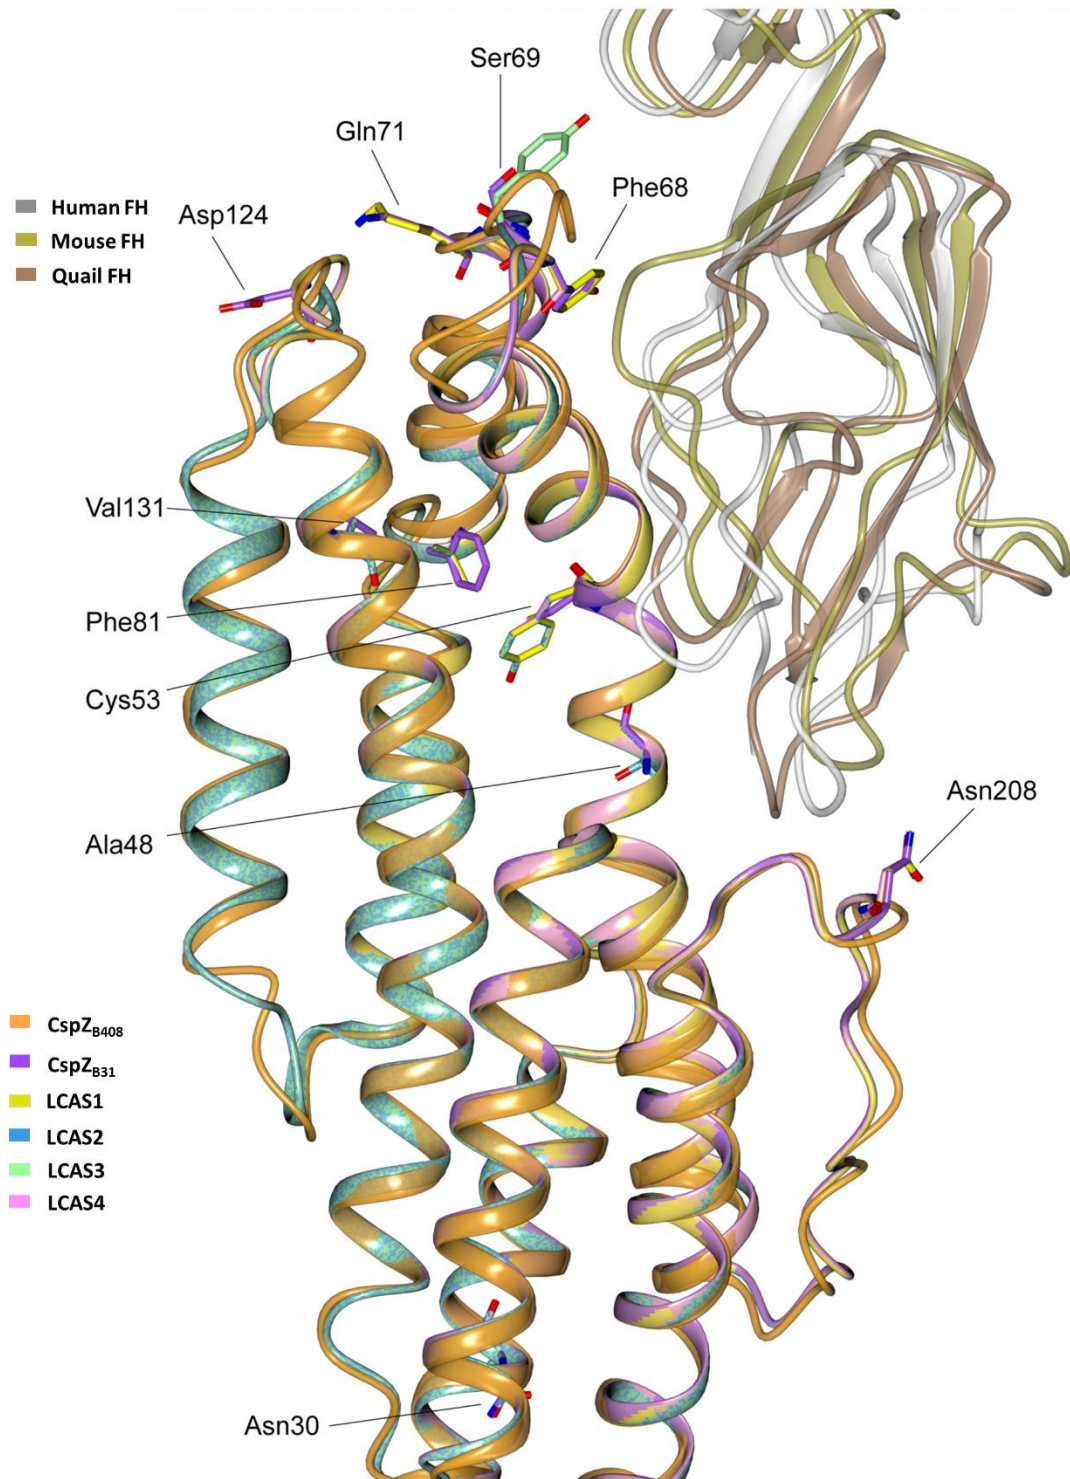

549

550



551 **Figure S13. The CspZ last common ancestor states are predicted to bind multiple types of**  
552 **FH.** The crystal structure of CspZ<sub>B408</sub>-SCR6-7 where human SCR6-7 (grey) is superimposed with  
553 mouse FH SCR6-7 (gold, PDB: 2YBY) and the predicted structure of quail SCR6-7 (brown).  
554 CspZ<sub>B408</sub> (orange) is superimposed with CspZ<sub>B31</sub> (purple) and the last common ancestor states:  
555 LCAS1 (yellow), LCAS2 (blue), LCAS3 (green), and LCAS4 (pink). Residues that differ between  
556 CspZ<sub>B31</sub> and the LCAS variants are labelled.

557

558

559

560

561

562

563

564

565

566

567

568

569

570

571

572

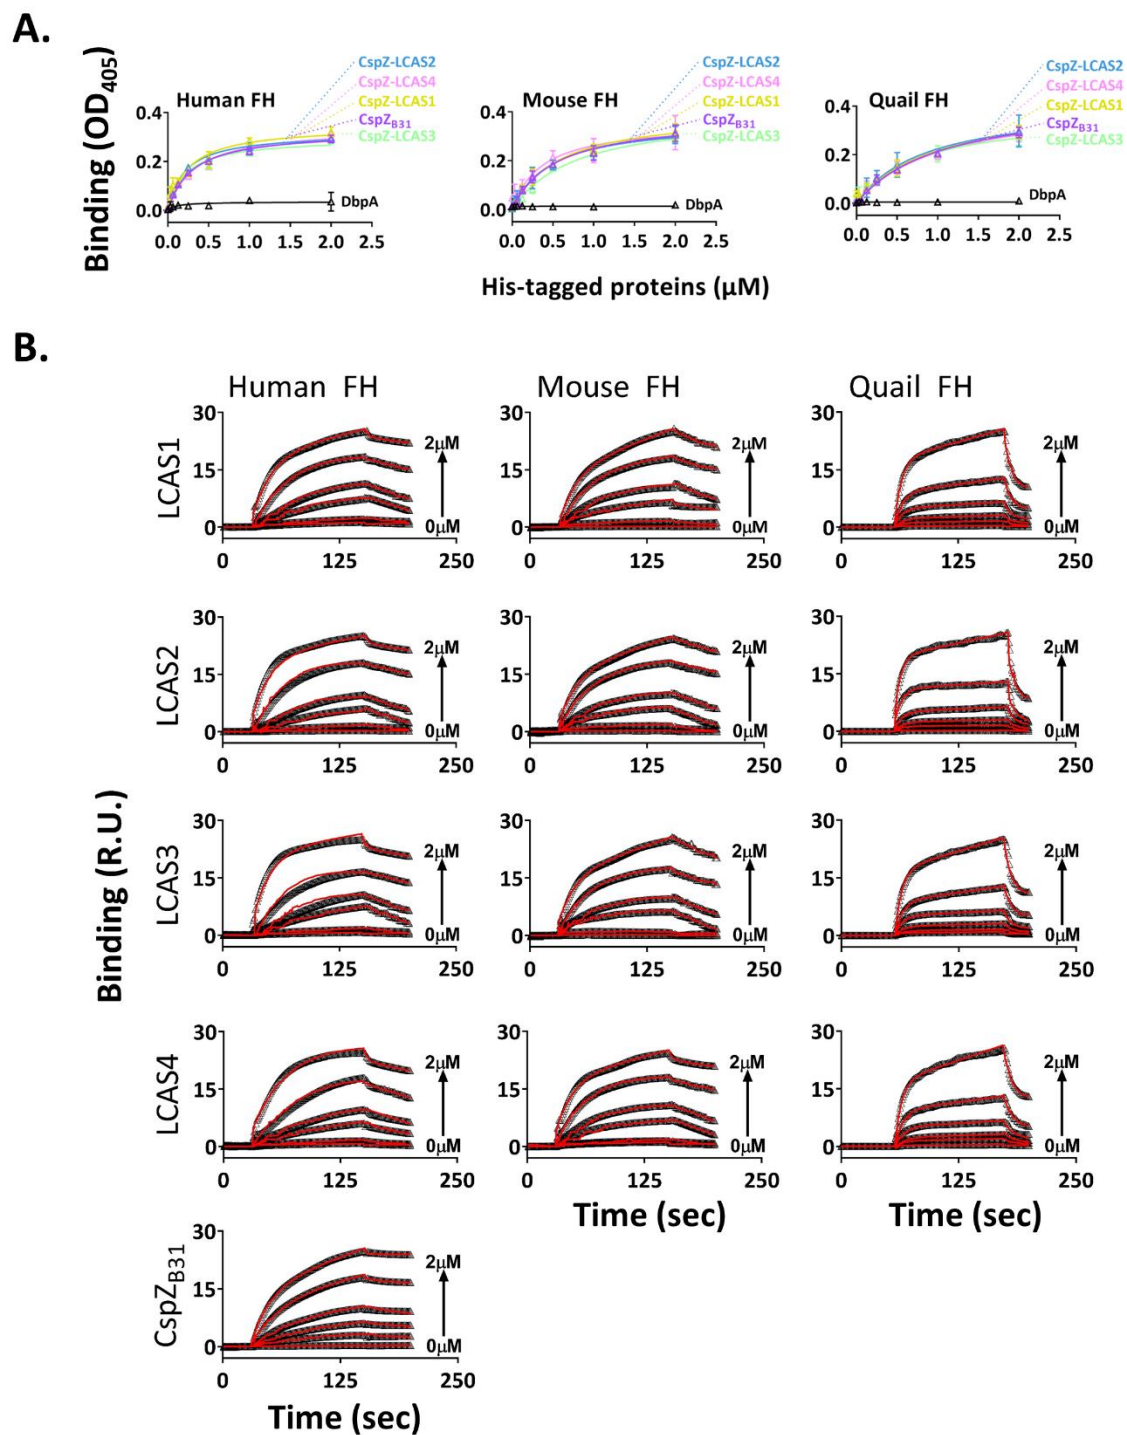

573

574 **Figure S14. The predicted last common ancestor states of CspZ bind to human, mouse and**

575 **quail FH. (A) The indicated concentrations of recombinant histidine-tagged last common ancestor**

576 states of CspZ or DbpA (negative control) were added to triplicate wells coated with FH, and  
577 protein binding was quantitated by ELISA. The experiments were performed with a single  
578 preparation of recombinant proteins tested in three independent iterations, in which samples were  
579 ran in duplicate. The  $K_D$  values (**Table S6**) representing the FH-binding affinity of each protein  
580 were determined from the average of three experiments. Shown is a representative iteration  
581 averaging the duplicates. **(B)** Ten micrograms FH were conjugated on a SPR chip. 0.008 to  $2\mu\text{M}$   
582 of the CspZ ancestor states or CspZ<sub>B31</sub> (control) was flowed over the chip surface. Binding was  
583 measured in response units (RU) by SPR. The experiments were performed with a single  
584 preparation of recombinant proteins tested in three independent replicates with samples ran in  
585 duplicate. Shown is one representative experiment. The  $k_{\text{on}}$ ,  $k_{\text{off}}$ , and  $K_D$  values were determined  
586 from the average of these three experiments (**Table S6**).

587

588

589

590

591

592

593

594

595

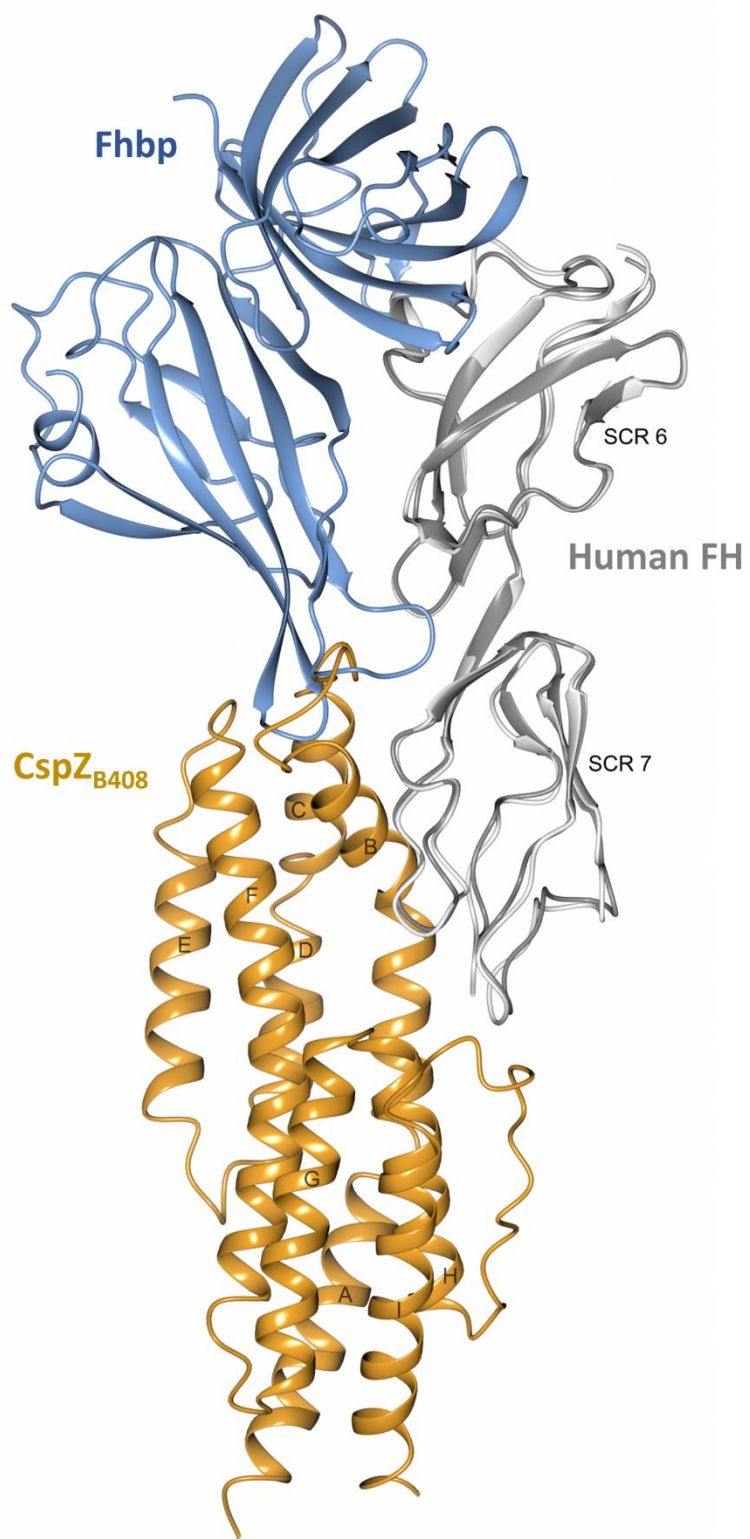

597 **Figure S15. Structural comparison between CspZ<sub>B408</sub>-human SCR6-7 and the *N. meningitidis***  
598 **Fhbp-human SCR6-7 complexes.** Human FH SCR6-7 (light grey) from the complex structure  
599 with CspZ<sub>B408</sub> (orange) was superimposed with human FH SCR6-7 (dark grey) from the complex  
600 structure with Fhbp (dark blue, PDB: 2W81), the FH-binding protein from *N. meningitidis*.  $\alpha$ -  
601 helices in CspZ<sub>B408</sub> are labelled from A to I starting from the N-terminus.

602

603

604

605

606

607

608

609

610

611

612

613

614

615

616

617

618

**A.**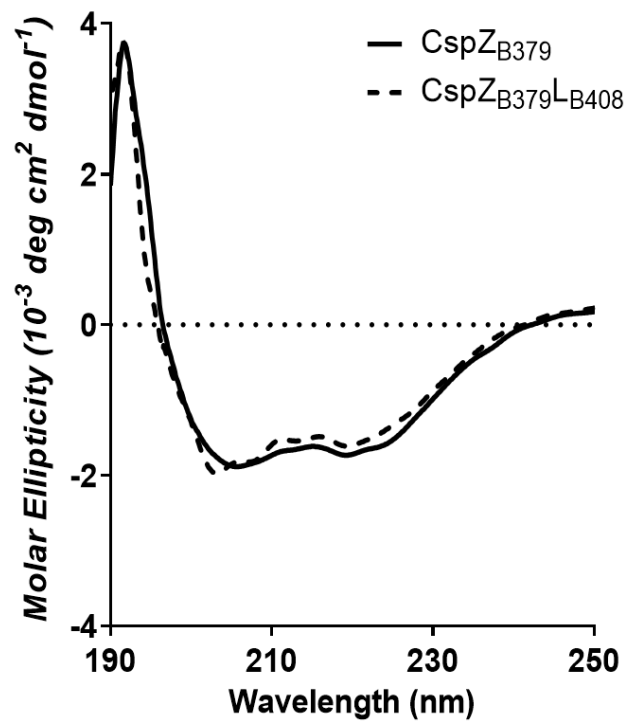**B.**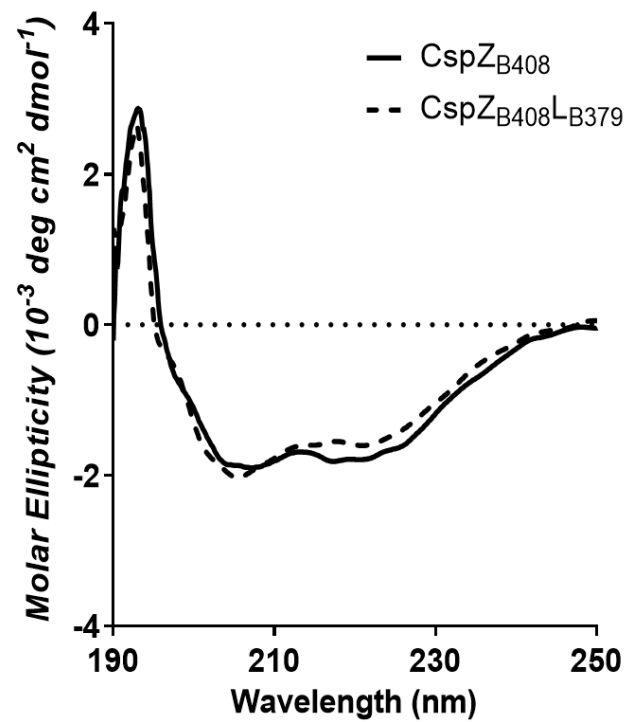

619

620 **Figure S16. CD spectra demonstrate no impacts of secondary structures by swapping the loops.** Far-UV CD analysis of

621 CspZ<sub>B379</sub>, CspZ<sub>B408</sub>, CspZ<sub>B379</sub>L<sub>B408</sub>, and CspZ<sub>B408</sub>L<sub>B379</sub>. The molar ellipticity,  $\Phi$ , was measured from 190-250nm for 10 $\mu$ M of

622 each protein in PBS.

623

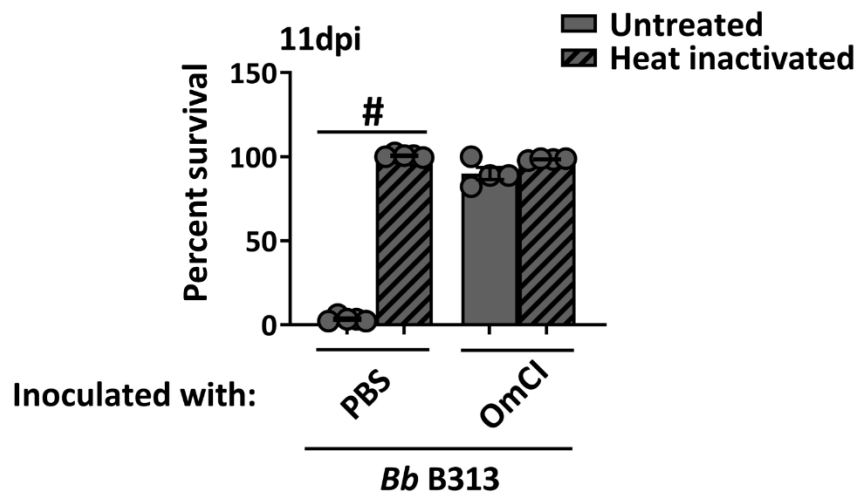

624  
625  
626  
627  
628  
629  
630  
631  
632  
633  
634  
635  
636  
637  
638  
639

**Figure S17. OmCI prevents quail serum-mediated killing of a complement-sensitive spirochete strain at 11 days post injection.** *Coturnix* quail were subcutaneously inoculated with OmCI (1mg/kg of quail) or PBS buffer. Untreated (filled bars) or heat-treated (hatched bars) sera collected from these quail at 11 days post inoculation (dpi) were incubated with a serum-sensitive, highly passaged *B. burgdorferi* strain B313. The number of live spirochetes were quantified microscopically using live/dead staining, and the survival percentage of the spirochetes was calculated using the number of live spirochetes at 4-h post incubation normalized to that at 0-h. Each bar represents the mean  $\pm$  SEM of three independent experiments from sera from four quail per group. Significant differences ( $p < 0.05$ , Mann-Whitney test) in the percentage survival of spirochetes are indicated (“#”).

640 **SUPPLEMENTAL REFERENCES**

- 641 1. T. Hart *et al.*, Polymorphic factor H-binding activity of CspA protects Lyme borreliae from  
642 the host complement in feeding ticks to facilitate tick-to-host transmission. *PLoS*  
643 *pathogens* **14**, e1007106 (2018).
- 644 2. A. L. Marcinkiewicz *et al.*, Blood treatment of Lyme borreliae demonstrates the  
645 mechanism of CspZ-mediated complement evasion to promote systemic infection in  
646 vertebrate hosts. *Cellular microbiology* **21**, e12998 (2019).
- 647 3. A. M. Frye *et al.*, A soft tick *Ornithodoros moubata* salivary protein OmCI is a potent  
648 inhibitor to prevent avian complement activation. *Ticks and tick-borne diseases* **11**, 101354  
649 (2020).
- 650 4. M. Combs *et al.*, Phylogenomic Diversity Elucidates Mechanistic Insights into Lyme  
651 Borreliae-Host Association. *mSystems* **7**, e0048822 (2022).
- 652 5. Y. P. Lin, Tufts, D.M., Combs, M., Dupuis II, A.P., Marcinkiewicz, A.L., Hirsbrunner,  
653 A.D., Diaz, A.J., Stout, J.L., Blom, A.M., Strle, K., Davis, A.D., Kramer, L.D.,  
654 Kolokotronis, S.O., Diuk-Wasser, M.A., Cellular and immunological mechanisms  
655 influence host-adapted phenotypes in a vector-borne microparasite. *Proc. Biol. Sci.* **289**,  
656 20212087 (2022).
- 657 6. M. B. Lawrenz *et al.*, Human antibody responses to VlsE antigenic variation protein of  
658 *Borrelia burgdorferi*. *Journal of clinical microbiology* **37**, 3997-4004 (1999).
- 659 7. S. R. Casjens *et al.*, Plasmid diversity and phylogenetic consistency in the Lyme disease  
660 agent *Borrelia burgdorferi*. *BMC Genomics* **18**, 165 (2017).



- 661 8. T. N. Petersen, S. Brunak, G. von Heijne, H. Nielsen, SignalP 4.0: discriminating signal  
662 peptides from transmembrane regions. *Nature methods* **8**, 785-786 (2011).
- 663 9. K. Brangulis *et al.*, Structural characterization of CspZ, a complement regulator factor H  
664 and FHL-1 binding protein from *Borrelia burgdorferi*. *The FEBS journal* **281**, 2613-2622  
665 (2014).
- 666 10. J. Chiu, P. E. March, R. Lee, D. Tillett, Site-directed, Ligase-Independent Mutagenesis  
667 (SLIM): a single-tube methodology approaching 100% efficiency in 4 h. *Nucleic acids*  
668 *research* **32**, e174 (2004).
- 669 11. U. Mueller *et al.*, Facilities for macromolecular crystallography at the Helmholtz-Zentrum  
670 Berlin. *J Synchrotron Radiat* **19**, 442-449 (2012).
- 671 12. M. D. Winn *et al.*, Overview of the CCP4 suite and current developments. *Acta*  
672 *crystallographica. Section D, Biological crystallography* **67**, 235-242 (2011).
- 673 13. P. R. Evans, An introduction to data reduction: space-group determination, scaling and  
674 intensity statistics. *Acta crystallographica. Section D, Biological crystallography* **67**, 282-  
675 292 (2011).
- 676 14. W. Kabsch, Xds. *Acta crystallographica. Section D, Biological crystallography* **66**, 125-  
677 132 (2010).
- 678 15. A. J. McCoy *et al.*, Phaser crystallographic software. *J Appl Crystallogr* **40**, 658-674  
679 (2007).
- 680 16. K. Cowtan, The Buccaneer software for automated model building. 1. Tracing protein  
681 chains. *Acta crystallographica. Section D, Biological crystallography* **62**, 1002-1011  
682 (2006).

- 683 17. P. Emsley, K. Cowtan, Coot: model-building tools for molecular graphics. *Acta*  
684 *crystallographica. Section D, Biological crystallography* **60**, 2126-2132 (2004).
- 685 18. G. N. Murshudov, A. A. Vagin, E. J. Dodson, Refinement of macromolecular structures by  
686 the maximum-likelihood method. *Acta crystallographica. Section D, Biological*  
687 *crystallography* **53**, 240-255 (1997).
- 688 19. J. Jumper *et al.*, Highly accurate protein structure prediction with AlphaFold. *Nature* **596**,  
689 583-589 (2021).
- 690 20. S. M. Kelly, T. J. Jess, N. C. Price, How to study proteins by circular dichroism. *Biochimica*  
691 *et biophysica acta* **1751**, 119-139 (2005).
- 692 21. Y. P. Lin *et al.*, Fibronectin binds to and induces conformational change in a disordered  
693 region of leptospiral immunoglobulin-like protein B. *The Journal of biological chemistry*  
694 **284**, 23547-23557 (2009).
- 695 22. J. E. Purser, S. J. Norris, Correlation between plasmid content and infectivity in *Borrelia*  
696 *burgdorferi*. *Proceedings of the National Academy of Sciences of the United States of*  
697 *America* **97**, 13865-13870 (2000).
- 698 23. Y. P. Lin *et al.*, Strain-specific joint invasion and colonization by Lyme disease spirochetes  
699 is promoted by outer surface protein C. *PLoS pathogens* **16**, e1008516 (2020).
- 700 24. J. E. Purser *et al.*, A plasmid-encoded nicotinamidase (PncA) is essential for infectivity of  
701 *Borrelia burgdorferi* in a mammalian host. *Molecular microbiology* **48**, 753-764 (2003).
- 702 25. J. Feng, T. Wang, S. Zhang, W. Shi, Y. Zhang, An optimized SYBR Green I/PI assay for  
703 rapid viability assessment and antibiotic susceptibility testing for *Borrelia burgdorferi*.  
704 *PloS one* **9**, e111809 (2014).

- 705 26. Y. P. Lin *et al.*, Strain-specific variation of the decorin-binding adhesin DbpA influences  
706 the tissue tropism of the Lyme disease spirochete. *PLoS pathogens* **10**, e1004238 (2014).
- 707 27. D. Drecktrah, D. S. Samuels, Genetic Manipulation of *Borrelia* Spp. *Current topics in*  
708 *microbiology and immunology* **415**, 113-140 (2018).
- 709 28. T. Hart, X. Yang, U. Pal, Y. P. Lin, Identification of Lyme borreliae proteins promoting  
710 vertebrate host blood-specific spirochete survival in *Ixodes scapularis* nymphs using  
711 artificial feeding chambers. *Ticks and tick-borne diseases* **9**, 1057-1063 (2018).
- 712 29. T. M. Hart *et al.*, Host tropism determination by convergent evolution of immunological  
713 evasion in the Lyme disease system. *PLoS pathogens* **17**, e1009801 (2021).
- 714 30. C. N. Takacs *et al.*, Polyploidy, regular patterning of genome copies, and unusual control  
715 of DNA partitioning in the Lyme disease spirochete. *Nature communications* **13**, 7173  
716 (2022).
- 717 31. Y. Uno, T. Usui, Y. Fujimoto, T. Ito, T. Yamaguchi, Quantification of interferon,  
718 interleukin, and Toll-like receptor 7 mRNA in quail splenocytes using real-time PCR.  
719 *Poultry science* **91**, 2496-2501 (2012).
- 720 32. T. Petnicki-Ocwieja *et al.*, Nod2 suppresses *Borrelia burgdorferi* mediated murine Lyme  
721 arthritis and carditis through the induction of tolerance. *PloS one* **6**, e17414 (2011).
- 722 33. R. Rose, O. Golosova, D. Sukhomlinov, A. Tiunov, M. Prosperi, Flexible design of  
723 multiple metagenomics classification pipelines with UGENE. *Bioinformatics* **35**, 1963-  
724 1965 (2019).
- 725 34. H. Li, Aligning sequence reads, clone sequences and assembly contigs with BWA-MEM.  
726 *arXiv* **1303**, 3997 (2013).

- 727 35. F. Abascal, R. Zardoya, M. J. Telford, TranslatorX: multiple alignment of nucleotide  
728 sequences guided by amino acid translations. *Nucleic acids research* **38**, W7-13 (2010).
- 729 36. D. H. Huson, D. Bryant, Application of phylogenetic networks in evolutionary studies. *Mol*  
730 *Biol Evol* **23**, 254-267 (2006).
- 731 37. P. Villesen, FaBox: an online toolbox for fasta sequences. *Mol Ecol Notes* **7**, 965-968  
732 (2007).
- 733 38. L. T. Nguyen, H. A. Schmidt, A. von Haeseler, B. Q. Minh, IQ-TREE: a fast and effective  
734 stochastic algorithm for estimating maximum-likelihood phylogenies. *Mol Biol Evol* **32**,  
735 268-274 (2015).
- 736 39. S. Kalyaanamoorthy, B. Q. Minh, T. K. F. Wong, A. von Haeseler, L. S. Jermin,  
737 ModelFinder: fast model selection for accurate phylogenetic estimates. *Nature methods* **14**,  
738 587-589 (2017).
- 739 40. D. T. Hoang, O. Chernomor, A. von Haeseler, B. Q. Minh, L. S. Vinh, UFBoot2:  
740 Improving the Ultrafast Bootstrap Approximation. *Mol Biol Evol* **35**, 518-522 (2018).
- 741 41. I. Letunic, P. Bork, Interactive Tree Of Life (iTOL) v5: an online tool for phylogenetic tree  
742 display and annotation. *Nucleic acids research* **49**, W293-W296 (2021).
- 743 42. S. Kumar, G. Stecher, M. Li, C. Knyaz, K. Tamura, MEGA X: Molecular Evolutionary  
744 Genetics Analysis across Computing Platforms. *Mol Biol Evol* **35**, 1547-1549 (2018).
- 745 43. S. L. Kosakovsky Pond, D. Posada, M. B. Gravenor, C. H. Woelk, S. D. Frost, Automated  
746 phylogenetic detection of recombination using a genetic algorithm. *Mol Biol Evol* **23**,  
747 1891-1901 (2006).

- 748 44. B. Murrell *et al.*, Gene-wide identification of episodic selection. *Mol Biol Evol* **32**, 1365-  
749 1371 (2015).
- 750 45. S. R. Wisotsky, S. L. Kosakovsky Pond, S. D. Shank, S. V. Muse, Synonymous Site-to-  
751 Site Substitution Rate Variation Dramatically Inflates False Positive Rates of Selection  
752 Analyses: Ignore at Your Own Peril. *Mol Biol Evol* **37**, 2430-2439 (2020).
- 753 46. B. Murrell *et al.*, FUBAR: a fast, unconstrained bayesian approximation for inferring  
754 selection. *Mol Biol Evol* **30**, 1196-1205 (2013).
- 755 47. S. L. Kosakovsky Pond, S. D. Frost, Not so different after all: a comparison of methods for  
756 detecting amino acid sites under selection. *Mol Biol Evol* **22**, 1208-1222 (2005).
- 757 48. B. Murrell *et al.*, Detecting individual sites subject to episodic diversifying selection. *PLoS*  
758 *genetics* **8**, e1002764 (2012).
- 759 49. S. Weaver *et al.*, Datamonkey 2.0: A Modern Web Application for Characterizing  
760 Selective and Other Evolutionary Processes. *Mol Biol Evol* **35**, 773-777 (2018).
- 761 50. S. Q. Le, O. Gascuel, An improved general amino acid replacement matrix. *Mol Biol Evol*  
762 **25**, 1307-1320 (2008).
- 763 51. C. M. Ross, G. Foley, M. Boden, E. M. J. Gillam, Using the Evolutionary History of  
764 Proteins to Engineer Insertion-Deletion Mutants from Robust, Ancestral Templates Using  
765 Graphical Representation of Ancestral Sequence Predictions (GRASP). *Methods in*  
766 *molecular biology* **2397**, 85-110 (2022).
- 767 52. M. Musil *et al.*, FireProtASR: A Web Server for Fully Automated Ancestral Sequence  
768 Reconstruction. *Brief Bioinform* **22** (2021).

- 769 53. M. A. Suchard *et al.*, Bayesian phylogenetic and phylodynamic data integration using  
770 BEAST 1.10. *Virus Evol* **4**, vey016 (2018).
- 771 54. M. Hasegawa, H. Kishino, T. Yano, Dating of the human-ape splitting by a molecular clock  
772 of mitochondrial DNA. *J Mol Evol* **22**, 160-174 (1985).
- 773 55. Z. Yang, Maximum likelihood phylogenetic estimation from DNA sequences with variable  
774 rates over sites: approximate methods. *J Mol Evol* **39**, 306-314 (1994).
- 775 56. K. S. Walter, G. Carpi, A. Caccone, M. A. Diuk-Wasser, Genomic insights into the ancient  
776 spread of Lyme disease across North America. *Nat Ecol Evol* **1**, 1569-1576 (2017).
- 777 57. X. Robert, P. Gouet, Deciphering key features in protein structures with the new ENDscript  
778 server. *Nucleic acids research* **42**, W320-324 (2014).
- 779 58. A. M. Waterhouse, J. B. Procter, D. M. Martin, M. Clamp, G. J. Barton, Jalview Version  
780 2--a multiple sequence alignment editor and analysis workbench. *Bioinformatics* **25**, 1189-  
781 1191 (2009).
- 782 59. Y. K. Benjamini, A. M. Yekutieli, D. , Adaptive linear step-up procedures that control the  
783 false discovery rate. *Biometrika* **93**, 491-507 (2006).
- 784 60. A. L. Marcinkiewicz *et al.*, Eliminating Factor H-Binding Activity of *Borrelia burgdorferi*  
785 CspZ Combined with Virus-Like Particle Conjugation Enhances Its Efficacy as a Lyme  
786 Disease Vaccine. *Frontiers in immunology* **9**, 181 (2018).
- 787 61. T. Hallstrom *et al.*, CspA from *Borrelia burgdorferi* inhibits the terminal complement  
788 pathway. *mBio* **4** (2013).

- 789 62. A. F. Elias *et al.*, Clonal polymorphism of *Borrelia burgdorferi* strain B31 MI: implications  
790 for mutagenesis in an infectious strain background. *Infection and immunity* **70**, 2139-2150  
791 (2002).
- 792 63. A. S. Coleman *et al.*, *Borrelia burgdorferi* complement regulator-acquiring surface protein  
793 2 does not contribute to complement resistance or host infectivity. *PloS one* **3**, 3010e  
794 (2008).
- 795 64. V. M. Benoit, J. R. Fischer, Y. P. Lin, N. Parveen, J. M. Leong, Allelic variation of the  
796 Lyme disease spirochete adhesin DbpA influences spirochetal binding to decorin,  
797 dermatan sulfate, and mammalian cells. *Infection and immunity* **79**, 3501-3509 (2011).
- 798 65. K. L. Frank, S. F. Bundle, M. E. Kresge, C. H. Eggers, D. S. Samuels, *aadA* confers  
799 streptomycin resistance in *Borrelia burgdorferi*. *Journal of bacteriology* **185**, 6723-6727  
800 (2003).
- 801
